# 1 **A promoter interaction map for cardiovascular disease genetics**

2

3 Lindsey E. Montefiori<sup>1</sup>, Débora R. Sobreira<sup>1</sup>, Noboru J. Sakabe<sup>1</sup>, Ivy Aneas<sup>1</sup>, Amelia C. Joslin<sup>1</sup>, Grace  
4 T. Hansen<sup>1</sup>, Grazyna Bozek<sup>1</sup>, Ivan P. Moskowitz<sup>1,2</sup>, Elizabeth M. McNally<sup>3</sup>, Marcelo A. Nóbrega<sup>1</sup>

5

6 <sup>1</sup>Department of Human Genetics, The University of Chicago, Chicago IL; <sup>2</sup>Department of Pediatrics and  
7 Pathology, The University of Chicago, Chicago IL; <sup>3</sup>Center for Genetic Medicine, Northwestern  
8 University Feinberg School of Medicine, Chicago IL

9

10

11

12

13

14

15

## 16 **Address for Correspondence:**

17 Marcelo A. Nóbrega  
18 Department of Human Genetics  
19 920 E. 58<sup>th</sup> St.  
20 CLSC Room 515  
21 773-702-1808  
22 Email: nobrega@uchicago.edu

Lindsey Montefiori  
Department of Human Genetics  
920 E 58<sup>th</sup> St.  
CLSC Room 515  
773-702-1808  
Email: lem@uchicago.edu

23

24 **Abstract**

25 Over 500 genetic loci have been associated with risk of cardiovascular diseases (CVDs),  
26 however most loci are located in gene-distal non-coding regions and their target genes are not known.  
27 Here, we generated high-resolution promoter capture Hi-C (PCHi-C) maps in human induced  
28 pluripotent stem cells (iPSCs) and iPSC-derived cardiomyocytes (CMs) to provide a resource for  
29 identifying and prioritizing the functional targets of CVD associations. We validate these maps by  
30 demonstrating that promoters preferentially contact distal sequences enriched for tissue-specific  
31 transcription factor motifs and are enriched for chromatin marks that correlate with dynamic changes in  
32 gene expression. Using the CM PCHi-C map, we linked 1,999 CVD-associated SNPs to 347 target  
33 genes. Remarkably, more than 90% of SNP-target gene interactions did not involve the nearest gene,  
34 while 40% of SNPs interacted with at least two genes, demonstrating the importance of considering  
35 long-range chromatin interactions when interpreting functional targets of disease loci.

36

37

38

39

40

41

42

43

44

45

## 46 Introduction

47 A major goal in human genetics research is to understand genetic contributions to complex  
48 diseases, specifically the molecular mechanisms by which common DNA variants impact disease  
49 etiology. Most genome-wide association studies (GWAS) implicate non-coding variants that are far from  
50 genes, complicating interpretation of their mode of action and correct identification of the target gene  
51 (Maurano et al. 2012). Mounting evidence suggests that disease variants disrupt the function of *cis*-  
52 acting regulatory elements, such as enhancers, which in turn affects expression of the specific gene or  
53 genes that are functional targets of these elements (Wright et al. 2010; Musunuru et al. 2010; Cowper-  
54 Sal-lari et al. 2012; Smemo et al. 2014; Claussnitzer et al. 2015). However, because *cis*-acting  
55 regulatory elements can be located kilobases (kb) away from their target gene(s), identifying the true  
56 functional targets of regulatory elements remains challenging (Smemo et al. 2014).

57 Chromosome conformation capture techniques such as Hi-C (Lieberman-Aiden et al. 2009)  
58 enable the genome-wide mapping of long-range chromatin contacts and therefore represent a  
59 promising strategy to identify distal gene targets of disease-associated genetic variants. Recently, Hi-C  
60 maps have been generated in numerous human cell types including embryonic stem cells and early  
61 embryonic lineages (Dixon et al. 2012, 2015), immune cells (Rao et al. 2014), fibroblasts (Jin et al.  
62 2013) and other primary tissue types (Schmitt et al. 2016). However, despite the increasing abundance  
63 of Hi-C maps, most datasets are of limited resolution (>40 kb) and do not precisely identify the genomic  
64 regions in contact with gene promoters.

65 More recently, promoter capture Hi-C (PCHi-C) was developed which greatly increases the  
66 power to detect interactions involving promoter sequences (Schoenfelder et al. 2015; Mifsud et al.  
67 2015). PCHi-C in different cell types identified thousands of enhancer-promoter contacts and revealed  
68 extensive differences in promoter architecture between cell types and throughout differentiation  
69 (Schoenfelder et al. 2015; Mifsud et al. 2015; Javierre et al. 2016; Freire-Pritchett et al. 2017; Rubin et  
70 al. 2017; Siersbæk et al. 2017). These studies collectively demonstrated that genome architecture

71 reflects cell identity, suggesting that disease-relevant cell types are critical for successful interrogation  
72 of the gene regulatory mechanisms of disease loci.

73 In support of this notion, several recent studies utilized high-resolution promoter interaction  
74 maps to identify tissue-specific target genes of GWAS associations. Javierre *et al.* generated promoter  
75 capture Hi-C data in 17 primary human blood cell types and identified 2,604 potentially causal genes for  
76 immune- and blood-related disorders, including many genes with unannotated roles in those diseases  
77 (Javierre et al. 2016). Similarly, Mumbach *et al.* interrogated GWAS SNPs associated with autoimmune  
78 diseases using HiChIP where they identified ~10,000 promoter-enhancer interactions that linked  
79 several hundred SNPs to target genes, most of which were not the nearest gene (Mumbach et al.  
80 2017). Importantly, both studies reported cell-type specificity of SNP-target gene interactions.

81 Cardiovascular diseases, including cardiac arrhythmia, heart failure, and myocardial infarction,  
82 continue to be the leading cause of death world-wide. Over 50 GWAS have been conducted for these  
83 specific cardiovascular phenotypes alone, with more than 500 loci implicated in cardiovascular disease  
84 risk (NHGRI GWAS catalog, <https://www.ebi.ac.uk/gwas/>), most of which map to non-coding genomic  
85 regions. To begin to dissect the molecular mechanisms by which genetic variants contribute to CVD  
86 risk, a comprehensive gene regulatory map of human cardiac cells is required. Here, we present high  
87 resolution promoter interaction maps of human iPSCs and iPSC-derived cardiomyocytes (CMs). Using  
88 PChi-C, we identified hundreds of thousands of promoter interactions in each cell type. We  
89 demonstrate the physiological relevance of these datasets by functionally interrogating the relationship  
90 between gene expression and long-range promoter interactions, and demonstrate the utility of long-  
91 range chromatin interaction data to resolve the functional targets of disease-associated loci.

## 92 **Results**

### 93 **iPSC-derived cardiomyocytes provide an effective model to study the architecture of CVD** 94 **genetics**

95 We used iPSC-derived CMs (Burridge et al. 2014) as a model to study cardiovascular gene  
96 regulation and disease genetics. The CMs generated in this study were 86-94% pure based on cardiac  
97 Troponin T protein expression and exhibited spontaneous, uniform beating (Figure 1—figure  
98 supplement 1A, Supplementary Mov. 1). To demonstrate that iPSCs and CMs recapitulate  
99 transcriptional and epigenetic profiles of matched primary cells, we conducted RNA-seq and ChIP-seq  
100 for the active enhancer mark H3K27ac in both cell types and compared these data with similar cell  
101 types from the Epigenome Roadmap Project (Roadmap Epigenomics Consortium et al. 2015). RNA-  
102 seq profiles of iPSCs clustered tightly with H1 embryonic stem cells, whereas CMs clustered with both  
103 left ventricle (LV) and fetal heart (FH) profiles (Figure 1—figure supplement 1B). Furthermore, we  
104 observed that matched cell types exhibited three-fold greater overlap in the number of promoter-distal  
105 H3K27ac ChIP-seq peaks than non-matched cell types (Figure 1—figure supplement 1C,D), indicating  
106 that both iPSCs and CMs recapitulate tissue-specific epigenetic states of human stem cells and primary  
107 cardiomyocytes, respectively.

108 To further validate our system, we analyzed differentially expressed genes between iPSCs and  
109 CMs. Among the top 10% of over-expressed genes in CMs were genes directly related to cardiac  
110 function including essential cardiac transcription factors (*GATA4*, *MEIS1*, *TBX5*, and *TBX20*) and  
111 differentiation products (*TNNT2*, *MYH7B*, *MYL7*, *ACTN2*, *NPPA*, *HCN4*, and *RYR2*) (fold-change > 1.5,  
112  $P_{\text{adj}} < 0.05$ , Figure 1—figure supplement 2A-C). Gene Ontology (GO) enrichment analysis for genes  
113 over-expressed in CMs relative to iPSCs further confirmed the cardiac-specific phenotypes of these  
114 cells with top terms relating to the development of the cardiac conduction system and cardiac muscle  
115 cell contraction (Figure 1—figure supplement 2D).

## 116 **Promoter-capture Hi-C identifies distal regulatory elements in iPSCs and CMs**

117 To comprehensively map long-range regulatory elements in iPSCs and CMs, we performed *in-*  
118 *situ* Hi-C (Rao et al. 2014) in triplicate iPSC-CM differentiations; importantly, we used the 4-cutter  
119 restriction enzyme MboI which generates ligation fragments with an average size of 422 bp, enabling

120 enhancer-level resolution of promoter contacts. We enriched iPSC and CM *in situ* Hi-C libraries for  
121 promoter interactions through hybridization with a set of 77,476 biotinylated RNA probes (“baits”)  
122 targeting 22,600 human RefSeq protein-coding promoters (see Methods) and sequenced each library  
123 to an average depth of ~413 million (M) paired-end reads. After removing duplicates and read-pairs that  
124 did not map to a bait, we obtained an average of 31M and 41M read-pairs per replicate for iPSC and  
125 CM, respectively. We used CHiCAGO (Cairns et al. 2016), a computational pipeline which accounts for  
126 bias from the sequence capture, to identify significant interactions and further filtered for those  
127 significant in at least two out of three replicates (see Methods). Finally, we exclusively focused on  
128 interactions that were separated by a distance of at least 10 kb. This criterion addresses the high  
129 frequency of close-proximity ligation events in Hi-C data, which are difficult to distinguish as random  
130 Brownian contacts or functional chromatin interactions (Cairns et al. 2016). In total, we identified  
131 350,062 promoter interactions in iPSCs and 401,098 in CMs. A large proportion (~55%) of interactions  
132 were shared between the two cell types, indicating that even at high resolution many long-range  
133 interactions are stable across cell types (Figure 1A). Approximately 20% of all interactions were  
134 between two promoters, demonstrating the high connectivity between genes and supporting the  
135 recently suggested role of promoters acting as regulatory inputs for distal genes (Dao et al. 2017; Diao  
136 et al. 2017) (Figure 1B). Most interactions were promoter-distal, with a median of ~170 kb between the  
137 promoter and the distal-interacting region (Figure 1C).

138 To compare the PCHi-C maps with known features of genome organization, we sequenced our  
139 pre-capture Hi-C libraries to an average depth of 665M reads per cell type and identified topologically  
140 associating domains (TADs) with TopDom (see Methods). TADs are organizational units of  
141 chromosomes defined by <1 megabase (Mb) genomic blocks that exhibit high self-interacting  
142 frequencies with a very low interaction frequency across TAD boundaries (Dixon et al. 2012; Nora et al.  
143 2012). Notably, this organization is thought to constrain the activity of *cis*-regulatory elements to target  
144 genes with the same TAD, as disruption of TAD boundaries has been shown to lead to aberrant

145 activation of genes in neighboring TADs (Nora et al. 2012; Lupiáñez et al. 2015; Franke et al. 2016;  
146 Symmons et al. 2016; Tsujimura et al. 2015). We found that the majority of PCHi-C interactions  
147 occurred within TADs (73% and 77% in iPSCs and CMs, respectively; Figure 1D and Figure 1—figure  
148 supplement 3A). TAD-crossing interactions (“inter-TAD”) contained proportionally more promoter-  
149 promoter interactions than intra-TAD interactions, and were more likely to overlap promoter-distal  
150 CTCF sites; however, they were similarly enriched for looping to distal H3K27ac sites, a mark of active  
151 chromatin (Figure 1—figure supplement 3B-D). Inter-TAD interactions had slightly lower CHiCAGO  
152 scores, reflecting a lower number of reads supporting these interactions, and spanned greater genomic  
153 distances than intra-TAD interactions (Figure 1—figure supplement 3E,F). Additionally, promoters with  
154 inter-TAD interactions were preferentially located close to TAD boundaries (Figure 1—figure  
155 supplement 3G) and had higher expression levels compared to promoters with intra-TAD interactions,  
156 particularly in CMs (Figure 1—figure supplement 3H). These observations are consistent with previous  
157 studies which demonstrated that highly expressed genes, specifically housekeeping genes, are  
158 enriched at TAD boundaries (Dixon et al. 2012).

159 To illustrate the utility of high-resolution PCHi-C interaction maps, we highlight the *GATA4* locus  
160 in Figures 1D and 1E. *GATA4* is a master regulator of heart development (Watt et al. 2004; Pikkarainen  
161 et al. 2004) and the *GATA4* gene is located in a TAD structure that is relatively stable between iPSCs  
162 and CMs (Figure 1D). However, PCHi-C identified increased interaction frequencies between the  
163 *GATA4* promoter and several H3K27ac-marked regions, including four *in vivo* validated heart  
164 enhancers from the Vista enhancer browser (Visel et al. 2007), specifically in CMs and coincident with  
165 strong up-regulation of *GATA4* (Figure 1 – figure supplement 2C). Although TAD-based analyses help  
166 define a gene’s *cis*-regulatory landscape, high resolution promoter interaction data provides the  
167 resolution necessary to precisely map enhancer-promoter interactions in the context of cellular  
168 differentiation.

169

170

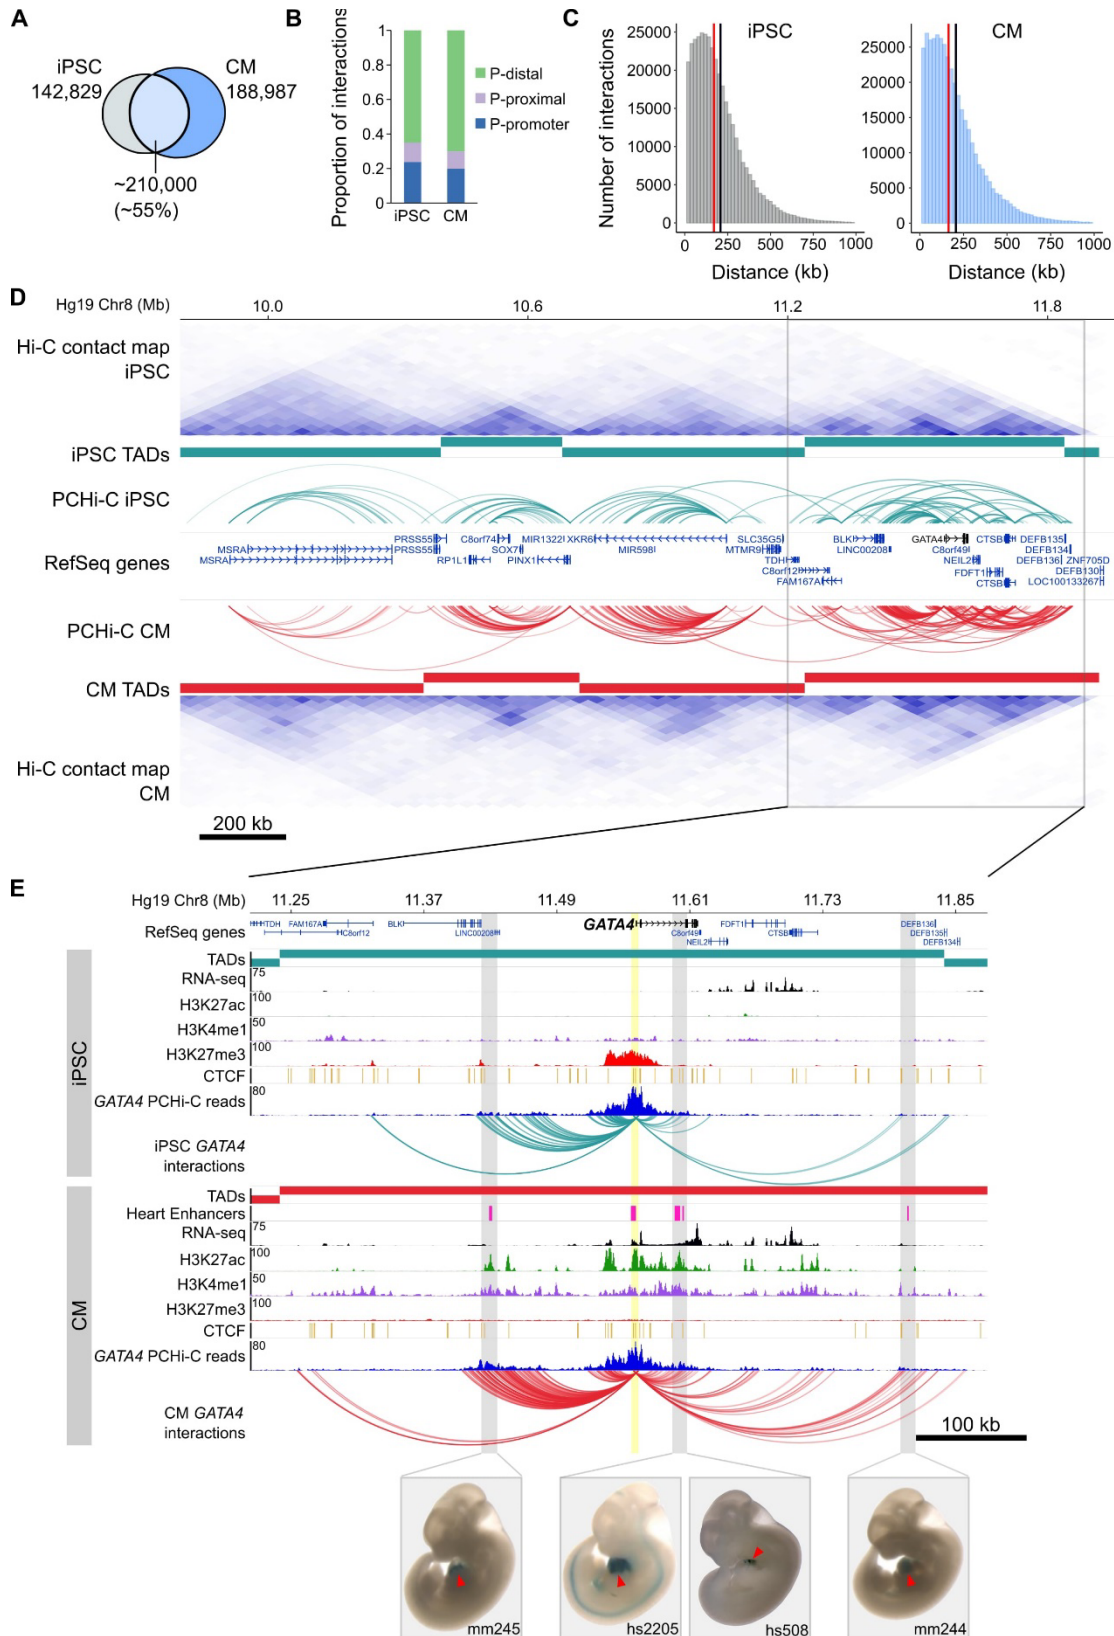

171



172 **Figure 1. General features of promoter interactions. (A)** Venn diagram displaying the number of cell  
173 type-specific and shared promoter interactions in each cell type. **(B)** Proportion of interactions in each  
174 distance category: promoter (P)-promoter (both interacting ends overlap a transcription start site  
175 (TSS)); P-proximal (non-promoter end overlaps captured region but not the TSS); P-distal (non-  
176 promoter end is outside of captured region). Note that all promoter interactions are separated by at  
177 least 10 kb. **(C)** Distribution of the distances spanning each interaction in iPSCs and CMs. The red line  
178 depicts the median (170 kb in iPSCs, 164 kb in CMs); the black line depicts the mean (208 kb in iPSCs,  
179 206 kb in CMs). **(D)** A ~2 Mb region of chromosome 8 encompassing the *GATA4* gene is shown along  
180 with pre-capture (whole genome) Hi-C interaction maps at 40 kb resolution for iPSCs (top) and CMs  
181 (bottom). TADs called with TopDom are shown as colored bars (median TAD size = 640 kb in both cell  
182 types, mean TAD size = 742 kb in iPSCs and 743 kb in CMs) and significant PHi-C interactions as  
183 colored arcs. **(E)** Zoomed-in view of the *GATA4* locus (promoter highlighted in yellow) in iPSCs (top)  
184 and CMs (bottom) along with corresponding RNA-seq data generated as part of this study, and ChIP-  
185 seq data for H3K27ac, H3K4me1, H3K27me3 and CTCF from the Epigenome Roadmap  
186 Project/ENCODE (H1 and left ventricle for iPSC and CM, respectively). Filtered *GATA4* read counts  
187 used by CHiCAGO are displayed in blue with the corresponding significant interactions shown as arcs.  
188 For clarity, only *GATA4* interactions are shown. Gray highlighted regions show interactions overlapping  
189 *in vivo* validated heart enhancers (pink boxes), with representative E11.5 embryos for each enhancer  
190 element (Visel et al. 2007). Red arrowhead points to the heart.

191

192 To validate the CM interaction map as a resource for cardiovascular disease genetics we next  
193 extensively characterized several important aspects of genetic architecture in CMs. We compared CMs  
194 with iPSCs in each analysis as a measure of cell-type specificity. These analyses serve as benchmarks  
195 that build on established features of genome organization and aid interpretations of the roles that long  
196 range interactions play in gene regulation.

### 197 **Promoter interactions are enriched for tissue-specific transcription factor motifs**

198 Distal enhancers activate target genes through DNA looping, a mechanism that enables distally  
199 bound transcription factors to contact the transcription machinery of target promoters (Pennacchio et al.  
200 2013; Miele and Dekker 2008; Deng et al. 2012). To assess whether this feature of gene regulation was  
201 reflected in the iPSC and CM interactions, we conducted motif analysis using HOMER (Heinz et al.  
202 2010) on the set of promoter-distal interacting sequences in each cell type. We initially focused on  
203 interactions for genes differentially expressed between iPSCs and CMs (fold-change > 1.5,  $P_{\text{adj}} < 0.05$ ).

204 We identified CTCF as the most enriched motif in each case (Figures 2A,B), consistent with the known  
205 role of this factor in mediating long-range genomic interactions (Phillips and Corces 2009; Phillips-  
206 Cremins et al. 2013; Nora et al. 2017). Among the other top motifs, we identified the pluripotency factor  
207 motifs OCT4-SOX2-TCF-NANOG (OSN) and SOX2 as preferentially enriched in distal sequences  
208 looping to genes over-expressed in iPSCs (Figures 2A,C), whereas top motifs in distal sequences  
209 looping to genes over-expressed in CMs included TBX20, ESRRB and MEIS1 (Figures 2B,C). TBX20  
210 and MEIS1 transcription factors are important regulators of heart development and function (Cai et al.  
211 2005; Sakabe et al. 2012; Mahmoud et al. 2013) and ESRRB was previously identified as a potential  
212 binding partner of TBX20 in adult mouse cardiomyocytes (Shen et al. 2011). We also observed that  
213 distal interactions unique to either iPSCs or CMs were similarly enriched for tissue-specific transcription  
214 factor motifs (Figure 2D). In line with a recent report that AP-1 contributes to dynamic loop formation  
215 during macrophage development (Phanstiel et al. 2017), both iPSC- and CM-specific interactions were  
216 enriched for AP-1 motifs (Figure 2D), suggesting that AP-1 transcription factors may represent a  
217 previously unrecognized genome organizing complex.

218

219

220

221

222

223

224

225

226

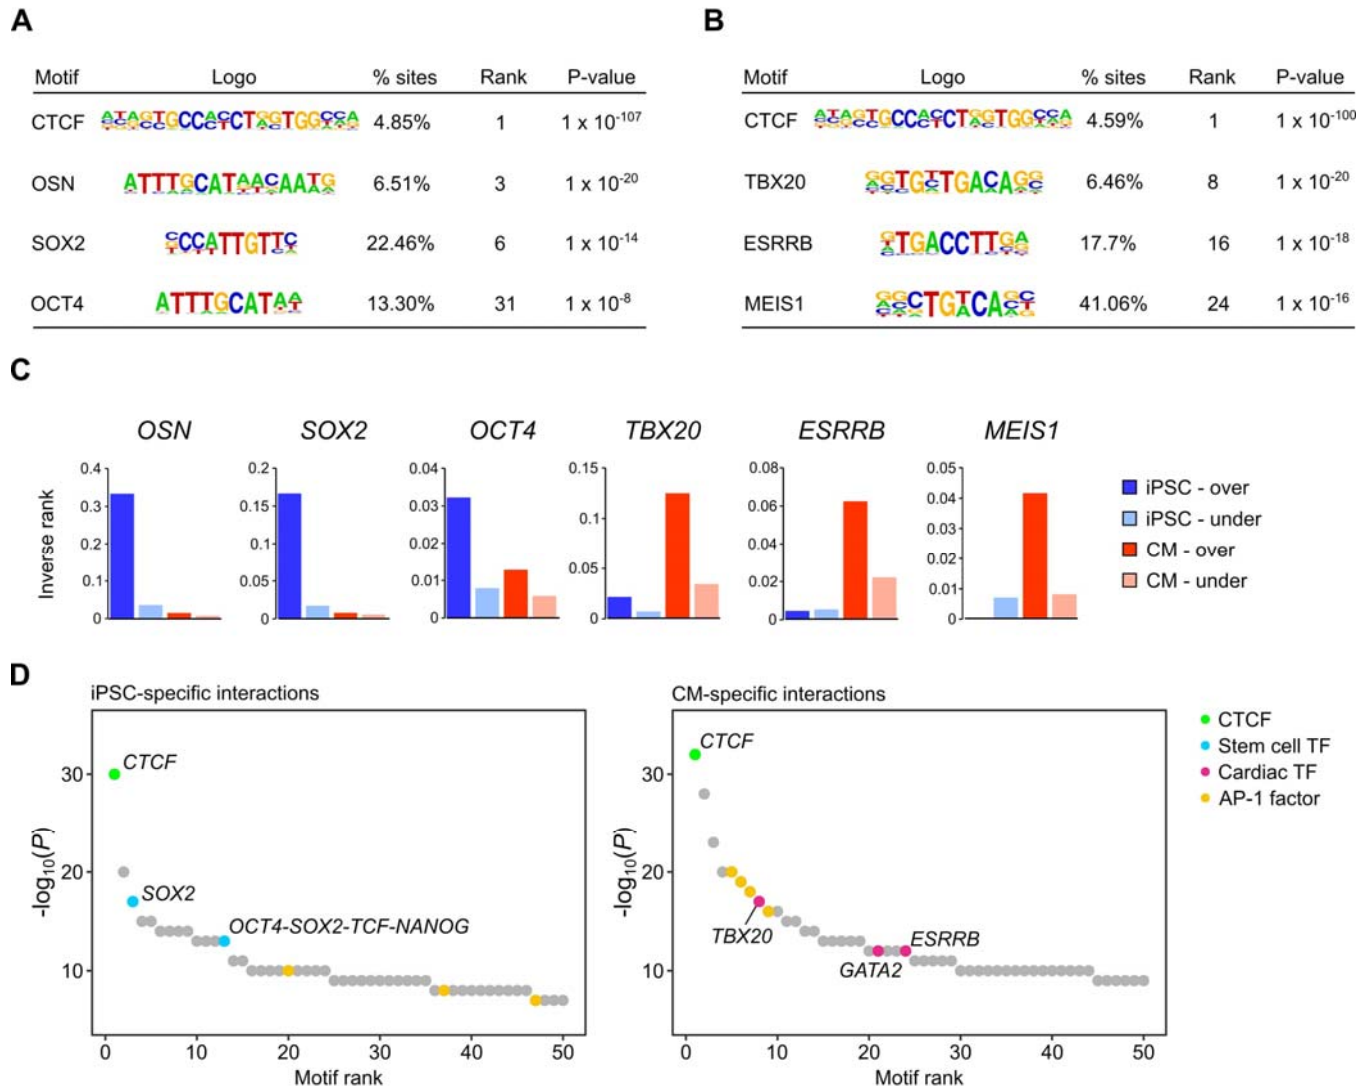

227

228 **Figure 2. Transcription factor motif enrichment in distal interacting regions. (A,B)** Selected  
 229 transcription factor (TF) motifs identified using HOMER in the promoter-distal interacting sequences for  
 230 all over-expressed genes in **(A)** iPSCs and **(B)** CMs (fold change > 1.5,  $P_{adj} < 0.05$ ). “% sites” refers to  
 231 the percent of distal interactions overlapping the motif; rank is based on P-value significance. **(C)** To  
 232 compare motif ranks across gene sets, the inverse of the rank is plotted for selected motifs identified in  
 233 distal interactions from over- or under-expressed genes in both iPSCs and CMs. **(D)** The top 50 motifs  
 234 identified in cell type-specific interactions. OSN, OCT4-SOX2-TCF-NANOG motif.

235

236 **Long-range promoter interactions are enriched for active cis-regulatory elements and**  
 237 **correspond to gene expression dynamics**

238           Functionally active *cis*-regulatory elements are characterized by the presence of specific histone  
239 modifications; active enhancers are generally associated with H3K4me1 and H3K27ac (Creyghton et  
240 al. 2010; Heintzman et al. 2009), whereas inactive (e.g. poised or silenced) elements are often  
241 associated with H3K27me3 (Rada-Iglesias et al. 2011; Erceg et al. 2017). In support of the gene-  
242 regulatory function of long-range interactions, we found that the promoter-distal Mbol fragments  
243 involved in significant promoter interactions were enriched for these three histone modifications in both  
244 iPSCs and CMs (Figures 3A-C). When promoters were grouped by expression level, we observed that  
245 this enrichment increased with increasing expression for H3K27ac and H3K4me1, and decreased with  
246 increasing expression for H3K27me3, consistent with an additive nature of enhancer-promoter  
247 interactions (Schoenfelder et al. 2015; Javierre et al. 2016), and validating that PChI-C enriches for  
248 likely functional long-range chromatin contacts.

249           A strong correlation (Pearson correlation coefficient  $r > 0.7$ ) between the degree of histone  
250 modifications and gene expression was first reported nearly ten years ago (Karlić et al. 2010), however  
251 that analysis only considered histone modifications within 2 kb of promoters. To understand whether  
252 this relationship extends beyond promoter-proximal regions, we correlated the number of histone ChIP-  
253 seq peaks within 300 kb of promoters with the promoter's expression level (Figure 3—figure  
254 supplement 1A,B). H3K27ac and H3K4me1 both positively correlated with expression level  
255 (Spearman's  $\rho = 0.22$  and  $0.16$ , respectively in iPSC and  $\rho = 0.23$  and  $0.24$ , respectively in CMs,  $P <$   
256  $2.2^{-16}$ ); in contrast, H3K27me3 negatively correlated with expression level in CMs (Spearman's  $\rho = -$   
257  $0.20$ ,  $P < 2.2^{-16}$ ), however this relationship was not present in iPSCs (Spearman's  $\rho = 0.02$ ,  $P = 0.06$ ).  
258 Although moderate, these correlations could partially explain why higher expressed genes show  
259 stronger enrichment for promoter interactions overlapping histone peaks when using a genome-wide  
260 background model (see Methods), and lends support to the notion that active genes are located in  
261 generally active genomic environments (Stevens et al. 2017; Gilbert et al. 2004).

262 We next investigated the relationship between cell type-specific interactions and enrichment for  
263 tissue-specific CTCF, H3K27ac, and H3K27me3 marks, hypothesizing that interactions unique to  
264 iPSCs or CMs would be most enriched for tissue-specific chromatin features. Indeed, we observed that  
265 cell type-specific interactions preferentially involved H3K27ac peaks from the matched cell type, and  
266 were either not enriched (iPSC) or depleted (CM) for H3K27ac marks that were specific to the non-  
267 matched cell type (Figure 3E, middle panel). However, the strongest enrichment was for cell type-  
268 specific interactions to overlap chromatin features that were present in both cell types (Figure 3E).  
269 Additionally, interactions that were shared between iPSCs and CMs were most enriched for shared  
270 chromatin features. These results suggest that all interactions, whether shared or unique to one cell  
271 type, preferentially contact regulatory regions that are active in both cell types, whereas cell type-  
272 specific interactions are not likely to occur in regions specifically marked in the non-matched cell type.

273 An example of a gene that encompasses these observations is the atrial natriuretic peptide  
274 gene *NPPA* (Figure 3F) which is specifically expressed in cells of the heart atrium and is upregulated in  
275 CMs (Figure 1—figure supplement 2C). *NPPA* makes numerous cell type-specific interactions to a  
276 distal region that is only marked with active chromatin (H3K27ac and H3K4me1) in CMs; furthermore,  
277 functional characterization showed that this region corresponds to an *in vivo* enhancer recapitulating  
278 *NPPA*'s endogenous expression in the developing heart (Visel et al. 2007). Taken together, these  
279 results illuminate the complex relationship between long-range promoter interactions and gene  
280 regulation and provide evidence that promoter architecture reflects cell type-specific gene expression.

281

282

283

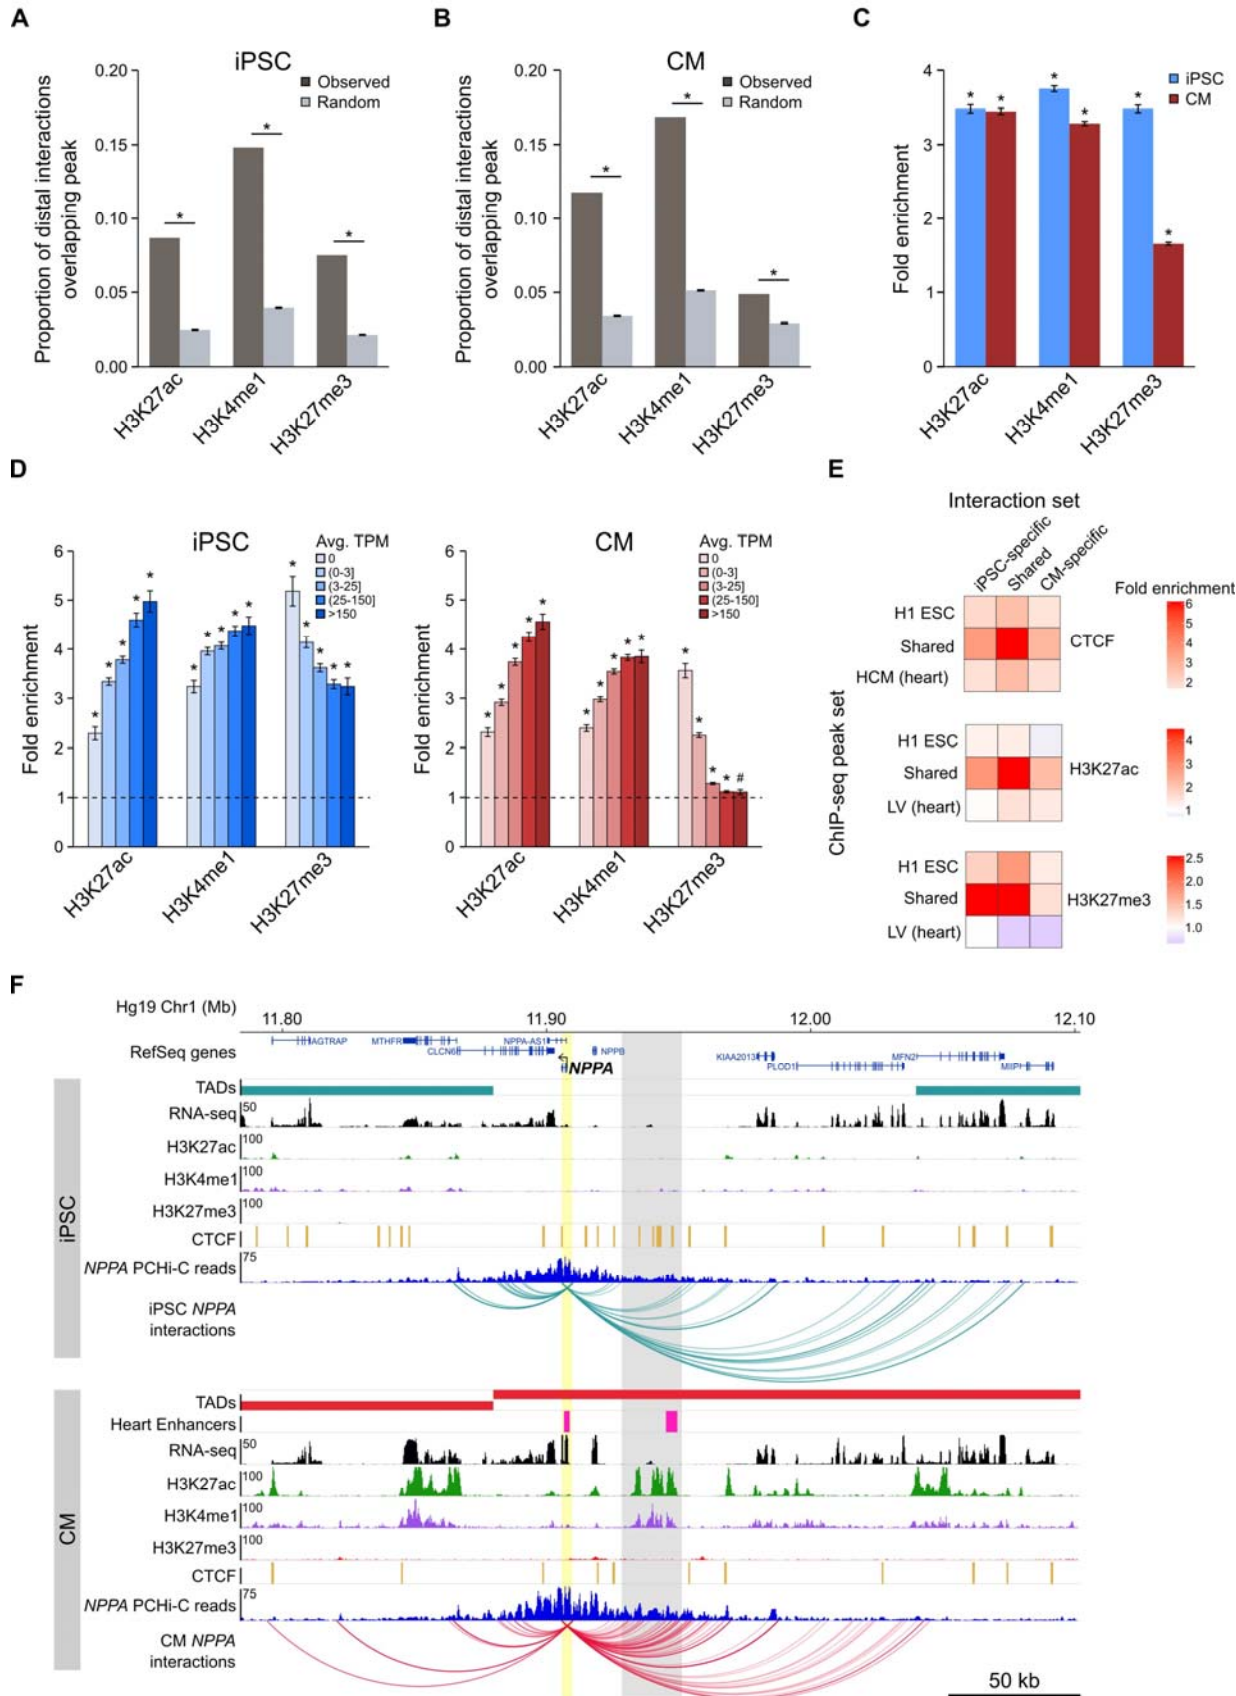

285 **Figure 3. Enrichment of promoter interactions to distal regulatory features. (A,B)** Proportion of  
286 promoter-distal interactions overlapping a histone ChIP-seq peak compared to random control MboI  
287 fragments (see Methods). iPSC interactions were overlapped with H1 ESC ChIP-seq data; CM  
288 interactions were overlapped with left ventricle ChIP-seq data from the Epigenome Roadmap Project  
289 (Supplementary File 10). **(C)** Fold enrichment of the data presented in **(A)** and **(B)**. **(D)** Fold enrichment  
290 of promoter-distal interactions based on the expression level of the promoter. Promoters were grouped  
291 into 5 bins according to their average TPM values. Dashed line indicates no enrichment. **(E)** Fold  
292 enrichment of cell type-specific and shared interactions (columns) to tissue-specific and shared  
293 chromatin features (rows). **(F)** Example of the *NPPA* gene in iPSCs (top) and CMs (bottom). Gray box  
294 highlights CM-specific interactions to CM-specific chromatin marks and an *in vivo* heart enhancer (Visel  
295 et al. 2007). For clarity, only interactions for *NPPA* are shown. \* $P < 0.00001$ , # $P = 0.0017$ , Z-test.

296

### 297 **Dynamic changes in genomic compartmentalization involve a subset of cardiac-specific genes**

298 As a final benchmark of our datasets, we analyzed large-scale differences in genome  
299 organization between iPSCs and CMs. The first Hi-C studies revealed that the genome is organized in  
300 two major compartments, A and B, that correspond to open and closed regions of chromosomes,  
301 respectively (Lieberman-Aiden et al. 2009; Rao et al. 2014). Although most compartments are stable  
302 across different cell types, some compartments switch states in a cell type-specific manner which may  
303 reflect important gene regulatory changes (Dixon et al. 2015). To assess whether capture Hi-C data,  
304 which is more cost-effective for capturing promoter-centered interactions, is able to identify A/B  
305 compartments, we compared our capture Hi-C data with pre-capture, genome-wide Hi-C libraries. A/B  
306 compartments identified using HOMER (Heinz et al. 2010) were remarkably similar in the whole-  
307 genome and PChi-C datasets (97% correspondence, Figure 4A, top panel, and Figure 4—figure  
308 supplements 1 and 2), demonstrating that PChi-C data contains sufficient information to identify  
309 broadly active and inactive regions of the genome. As an example, we highlight a 10 Mb region on  
310 chromosome 4 containing the *CAMK2D* gene locus (Figure 4A). Compartments were relatively stable  
311 across this region in iPSCs and CMs, however the *CAMK2D* gene itself was located in a dynamic  
312 compartment that switched from inactive in iPSCs to active in CMs. Correspondingly, this gene was  
313 highly upregulated during differentiation to CMs (Figure 4A, inset).

314 We observed this effect on a global level, as genes located in A compartments were expressed  
315 at significantly higher levels than genes located in the B compartments in both iPSCs and CMs (Figure  
316 4B). Additionally, genes that switched A/B compartments between cell types were correspondingly up-  
317 or down-regulated (Figure 4C). GO analysis of the 1,008 genes that switched from B to A  
318 compartments during iPSC-CM differentiation revealed enrichment for terms such as “cardiovascular  
319 system development” and “heart contraction” (Figure 4D, Supplementary File 5). Importantly, these  
320 genes were identified based solely on their location in a dynamic genomic compartment and not from  
321 gene expression data. GO analysis for genes that switched from A to B compartments during iPSC-CM  
322 differentiation related to non-cardiac processes, such as skin development, epithelial cell differentiation  
323 and sex determination (Figure 4—figure supplement 3, Supplementary Files 5 and 6). These data show  
324 that PCHi-C accurately captured tissue-specific interactions and indicate that compartmentalization of  
325 genes in spatially regulated regions of the nucleus may be one mechanism to ensure tissue-specific  
326 gene expression (Dixon et al. 2015). In summary, our analyses demonstrated that CM promoter  
327 interactions recapitulate key features of cardiac gene regulation and function, validating the CM map as  
328 an important tool to investigate CVD genetics.

329

330

331

332

333

334

335

336



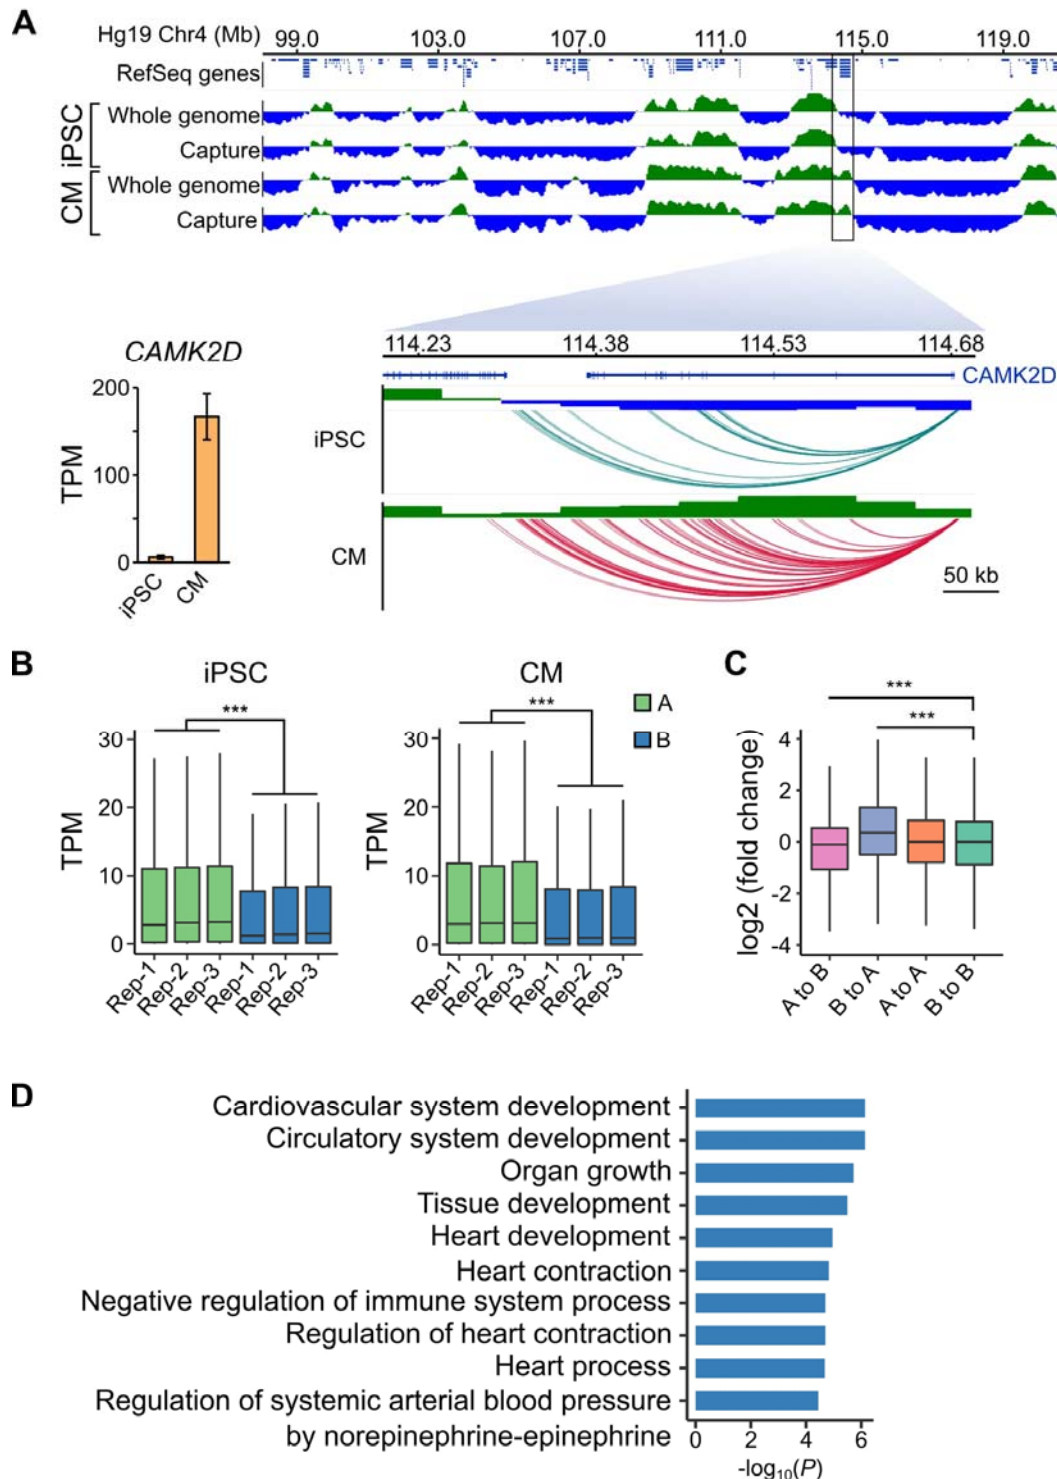

337

338 **Figure 4. A/B compartment switching corresponds to activation of tissue-specific genes. (A)** Top  
 339 panel: 10 Mb region on chromosome 4 showing A (green) and B (blue) compartments based on the first  
 340 principle component analysis calculated by HOMER (Heinz et al. 2010) of the whole-genome Hi-C and  
 341 capture Hi-C interaction data. Bottom panel: zoomed in on the *CAMK2D* locus; only capture Hi-C A/B

342 compartments shown. Inset: expression level of *CAMK2D* in iPSCs and CMs across the three  
343 replicates. **(B)** Expression level (TPM) of genes located in the A (green) or B (blue) compartment in  
344 each replicate of iPSC (left) or CM (right). **(C)** Difference in expression level (log<sub>2</sub> fold change relative  
345 to iPSCs) of genes switching compartments from iPSC to CM or remaining in stable compartments. **(D)**  
346 Gene Ontology analysis of biological processes associated with genes switching from B to A  
347 compartments during iPSC-CM differentiation. \*\*\*  $P < 2.2 \times 10^{-16}$ , Wilcoxon rank-sum test.

348

### 349 **CM promoter interactions link GWAS SNPs to target genes**

350 A particularly relevant application of high resolution promoter interaction maps is to guide post-  
351 GWAS studies by identifying the target genes of disease-associated variants. We employed this  
352 approach to link GWAS SNPs for several major cardiovascular diseases to their target gene(s) using  
353 the CM interaction map. We compiled 524 lead SNPs from the NHGRI database  
354 (<https://www.ebi.ac.uk/gwas/>) for three important classes of CVDs: cardiac arrhythmias, heart failure,  
355 and myocardial infarction (Table 1, Supplementary Files 7 and 8). Because of linkage disequilibrium  
356 (LD) patterns, the true causal SNP could be any SNP in high LD with the lead variant. Therefore, we  
357 expanded this set of SNPs to include all variants in high LD ( $r^2 > 0.9$ , within 50 kb of lead SNP),  
358 increasing the number of putatively causal variants to 10,475 (hereafter called LD SNPs). We found  
359 that 1,999 (19%) of the LD SNPs were located in promoter-distal Mbol fragments that interacted with  
360 the promoters of 347 genes in CMs (Supplementary File 8), hereafter referred to as target genes. The  
361 majority (89%) of LD SNP-target gene pairs were located within the same TAD, with a median distance  
362 of 185kb between each SNP-target gene pair (Figure 5A). Importantly, 90.4% of SNP-target gene  
363 interactions skipped at least one gene promoter and 42% of SNPs interacted with at least two different  
364 promoters (Figure 5B).

365

366

367

368

369 **Table1. Summary of the SNPs and target genes characterized in each disease class**

|                       | Arrhythmia | Myocardial Infarction | Heart Failure | Combined |
|-----------------------|------------|-----------------------|---------------|----------|
| Number of studies     | 30         | 11                    | 11            | 50       |
| Tag SNPs              | 358        | 86                    | 80            | 524      |
| SNPs in LD            | 6,555      | 1,822                 | 2,098         | 10,475   |
| SNPs looping to genes | 1,152      | 357                   | 490           | 1,999    |
| Target genes          | 237        | 72                    | 53            | 347      |

370 Summary values for each disease group are depicted along with the total number of GWAS, SNPs, and  
371 target genes ("Combined" column). Tag SNPs were identified from the published GWAS in the NHGRI-  
372 EBI database; SNPs in LD are the total number of non-promoter SNPs (including tag SNPs) in LD ( $r^2$   
373  $>0.9$ ) with the tag SNPs in each disease group; SNPs looping to genes are the SNPs in LD that are in a  
374 distal promoter interaction; Target genes are all genes with an interaction to a promoter-distal SNP.  
375 See Supplementary File 8 for a complete list of all GWAS, coordinates of each SNP and its assigned  
376 target gene, expression level in iPSC and CM, and mouse knock-out phenotype where available.

377

378 To confirm that the CM PChi-C interactions linked SNPs to CVD-relevant target genes, we  
379 performed GO analysis and found that target genes were highly and specifically enriched for biological  
380 processes related to cardiac function, such as membrane repolarization and cardiac conduction (Figure  
381 5C, left panel and Supplementary Files 5 and 6). As a control, we used iPSC interactions to link the  
382 same SNPs to target genes and observed a completely different set of unrelated biological processes  
383 for these genes (Figure 5C, right panel). To further characterize the biological relevance of target  
384 genes, we mined mouse knock-out data from the Mouse Genome Informatics (MGI) database (Blake et  
385 al. 2017), which revealed that a statistically significant number of target genes resulted in a  
386 cardiovascular phenotype when knocked-out in the mouse (78 genes (22.4%),  $P = 1 \times 10^{-5}$ , Figure 5D).  
387 Finally, we examined expression quantitative trait loci (eQTL) data from human left ventricle (LV) tissue  
388 and found that of the 1,999 LD SNPs in interactions, 410 (20.5%) corresponded to LV eQTLs; in  
389 comparison, only 12.2% of the full set of LD SNPs corresponded to LV eQTLs ( $P < 0.00001$ , Figure

390 5E). We next assessed whether eQTLs loop to their associated gene. For this analysis, we considered  
391 the full set of LV eQTLs, as the 410 LD SNP eQTLs represent too small of a proportion of the full set  
392 (<0.1% of all LV eQTLs) to fully ascertain significance. On a genome-wide level, LV eQTLs in promoter-  
393 distal interactions were significantly more likely to loop to their associated gene than expected by  
394 chance ( $P < 0.00001$ , Figure 5F, left panel). Importantly, this significance decreased when LV eQTLs  
395 were analyzed with iPSC promoter interactions ( $P = 0.035$ , Figure 5F, right panel). Taken together,  
396 these results indicate that CM promoter interactions identify a subset of disease-relevant SNPs most  
397 likely to be functional and support the use of the CM map to assign distal CVD-associated SNPs to  
398 putative target genes.

399

400

401

402

403

404

405

406

407

408

409

410

411

412

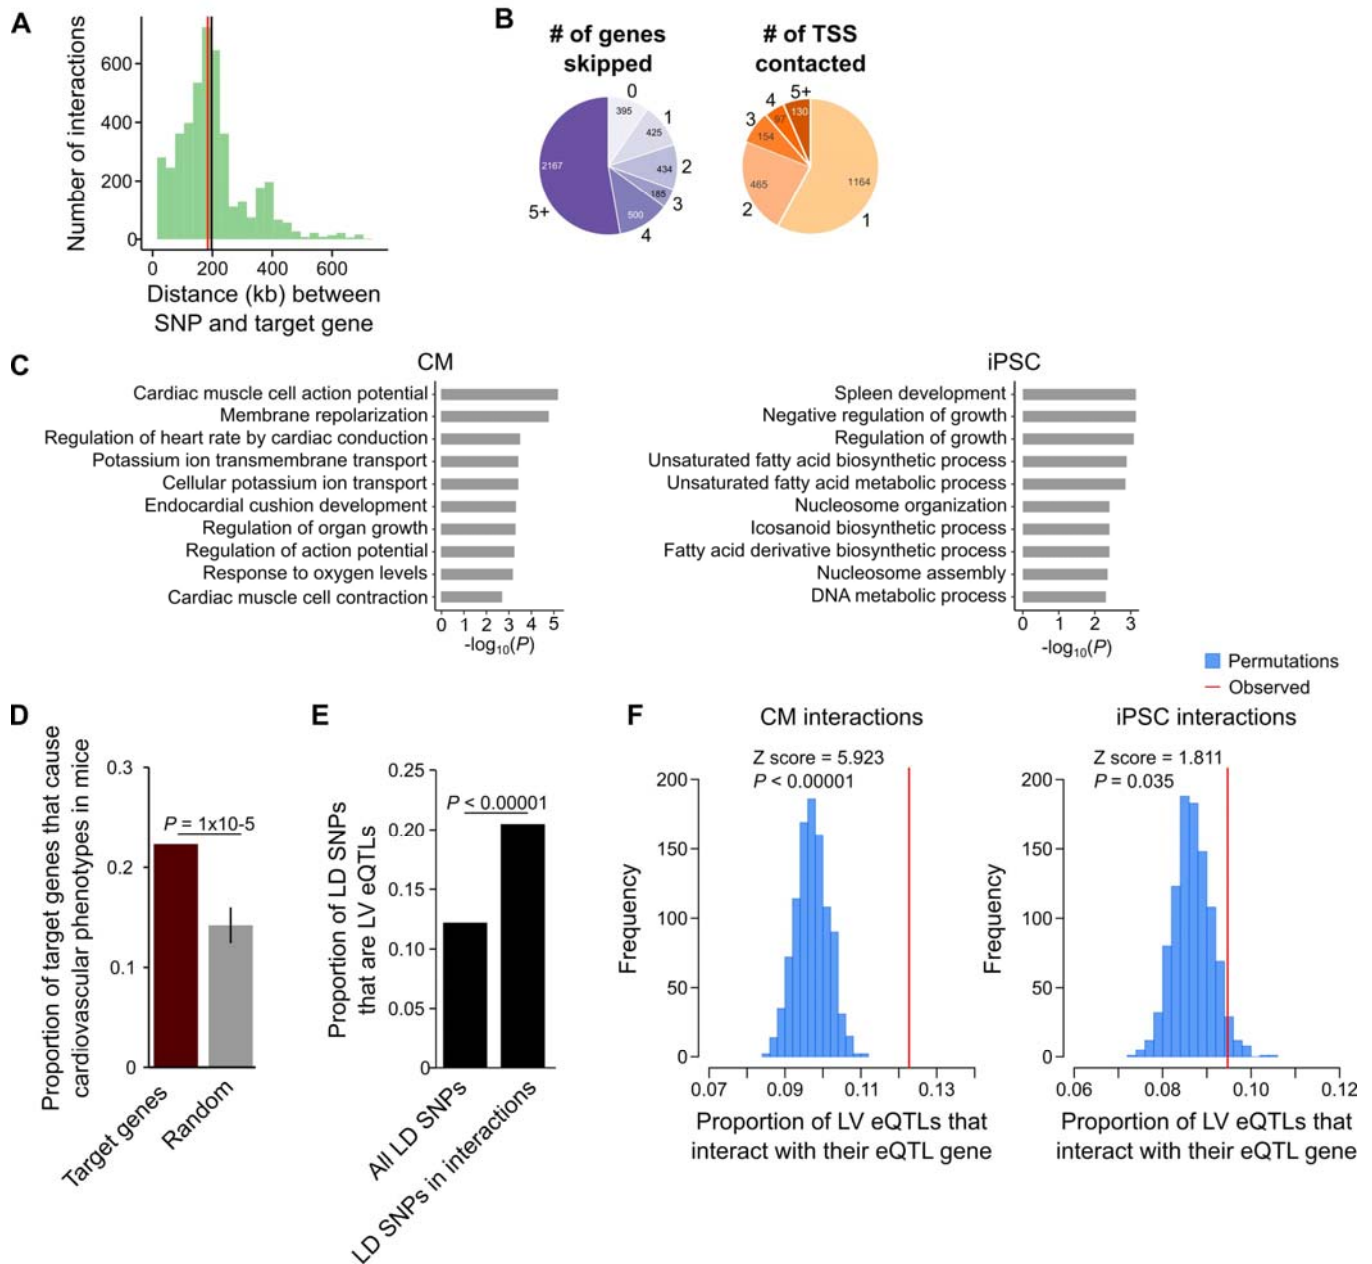

413

414 **Figure 5. CM promoter interactions link CVD GWAS SNPs to target genes.** (A) Distribution of  
 415 genomic distances separating SNP-target gene interactions (red line, median = 185 kb; black line,  
 416 mean = 197 kb). (B) Pie chart showing the number of TSS's skipped for each SNP-target gene  
 417 interaction (left) and the number of genes contacted by each SNP (right). (C) GO enrichment analysis  
 418 for genes looping to LD SNPs using the CM promoter interaction data (left panel) or the iPSC promoter  
 419 interaction data (right panel). (D) Proportion of target genes that result in a cardiovascular phenotype  
 420 when knocked-out in the mouse (MGI database (Blake et al. 2017)), compared to a random control set.

421 P-value calculated with a Z-test. **(E)** Proportion of GWAS LD SNPs that are eQTLs in left ventricle (LV)  
422 when considering either the full set of LD SNPs, or the subset that overlap CM promoter interactions. P-  
423 value calculated with Fisher's exact test. **(F)** Proportion of LV eQTLs (genome-wide) that map within a  
424 promoter interaction for the eQTL-associated gene (indicated by the red line). Random permutations  
425 were obtained by re-assigning each promoter's set of interactions to a new promoter and calculating  
426 the proportion of eQTLs in random interactions that interact with their eQTL-associated gene.  
427 Proportions only consider eQTLs that overlap a promoter-distal interaction. P-values calculated with a  
428 Z-test.

429

### 430 **Using gene expression as a metric for interpreting disease-relevance of newly identified target** 431 **genes**

432 Based on an enrichment of target genes with known cardiac function, we next assessed  
433 whether expression level is an informative metric to further prioritize functional follow-up studies. We  
434 examined the expression level of the 347 target genes and found that they were moderately over-  
435 expressed in CMs compared to iPSCs (median log<sub>2</sub> fold change = 1.08, mean log<sub>2</sub> fold change = 1.44,  
436 mean TPM values were 40.6 in iPSCs and 60.1 in CMs,  $P = 0.12$ , Figures 6A and 6B). Although not  
437 significant, this result reflects the enrichment of known cardiac-related genes that interact with CVD  
438 loci. However, because a subset of target genes was over-expressed in iPSCs relative to CMs (Figure  
439 6C), we predicted that gene expression level alone may be an insufficient metric to gauge the  
440 relevance of target genes to CVD biology. Indeed, we found that 21 of the 78 target genes (27%) that  
441 cause cardiovascular phenotypes when knocked-out in mice were overexpressed in iPSCs compared  
442 to CMs (Supplementary File 8). This result indicates that putatively causal genes may not appear as  
443 obvious candidates based solely on gene expression data.

444 To illustrate this point, we highlight two genes: *TBX5*, a gene directly linked to cardiac  
445 arrhythmia (Figure 6D) (Smemo et al. 2012; Arnolds et al. 2012), and *LITAF*, a gene that, until recently,  
446 had no obvious role in cardiac biology (Moshal et al. 2017) (Figure 6E). Both genes formed long-range  
447 interactions to LD SNPs identified in arrhythmia GWAS, making both genes candidate functional targets  
448 of the GWAS associations. *TBX5*, which is over-expressed in CMs (Figure 6C), is the most likely target

449 gene of the LD SNPs nearby based on the interaction data but also because of its known role in  
450 directing proper development of the cardiac conduction system. *LITAF*, on the other hand, was over-  
451 expressed in iPSCs compared to CMs (Figure 6C), and was not known to contribute to cardiac function  
452 until a recent study identified this gene as a regulator of cardiac excitation in zebrafish hearts (Moshal  
453 et al. 2017).

454

455

456

457

458

459

460

461

462

463

464

465

466

467

468

469

470

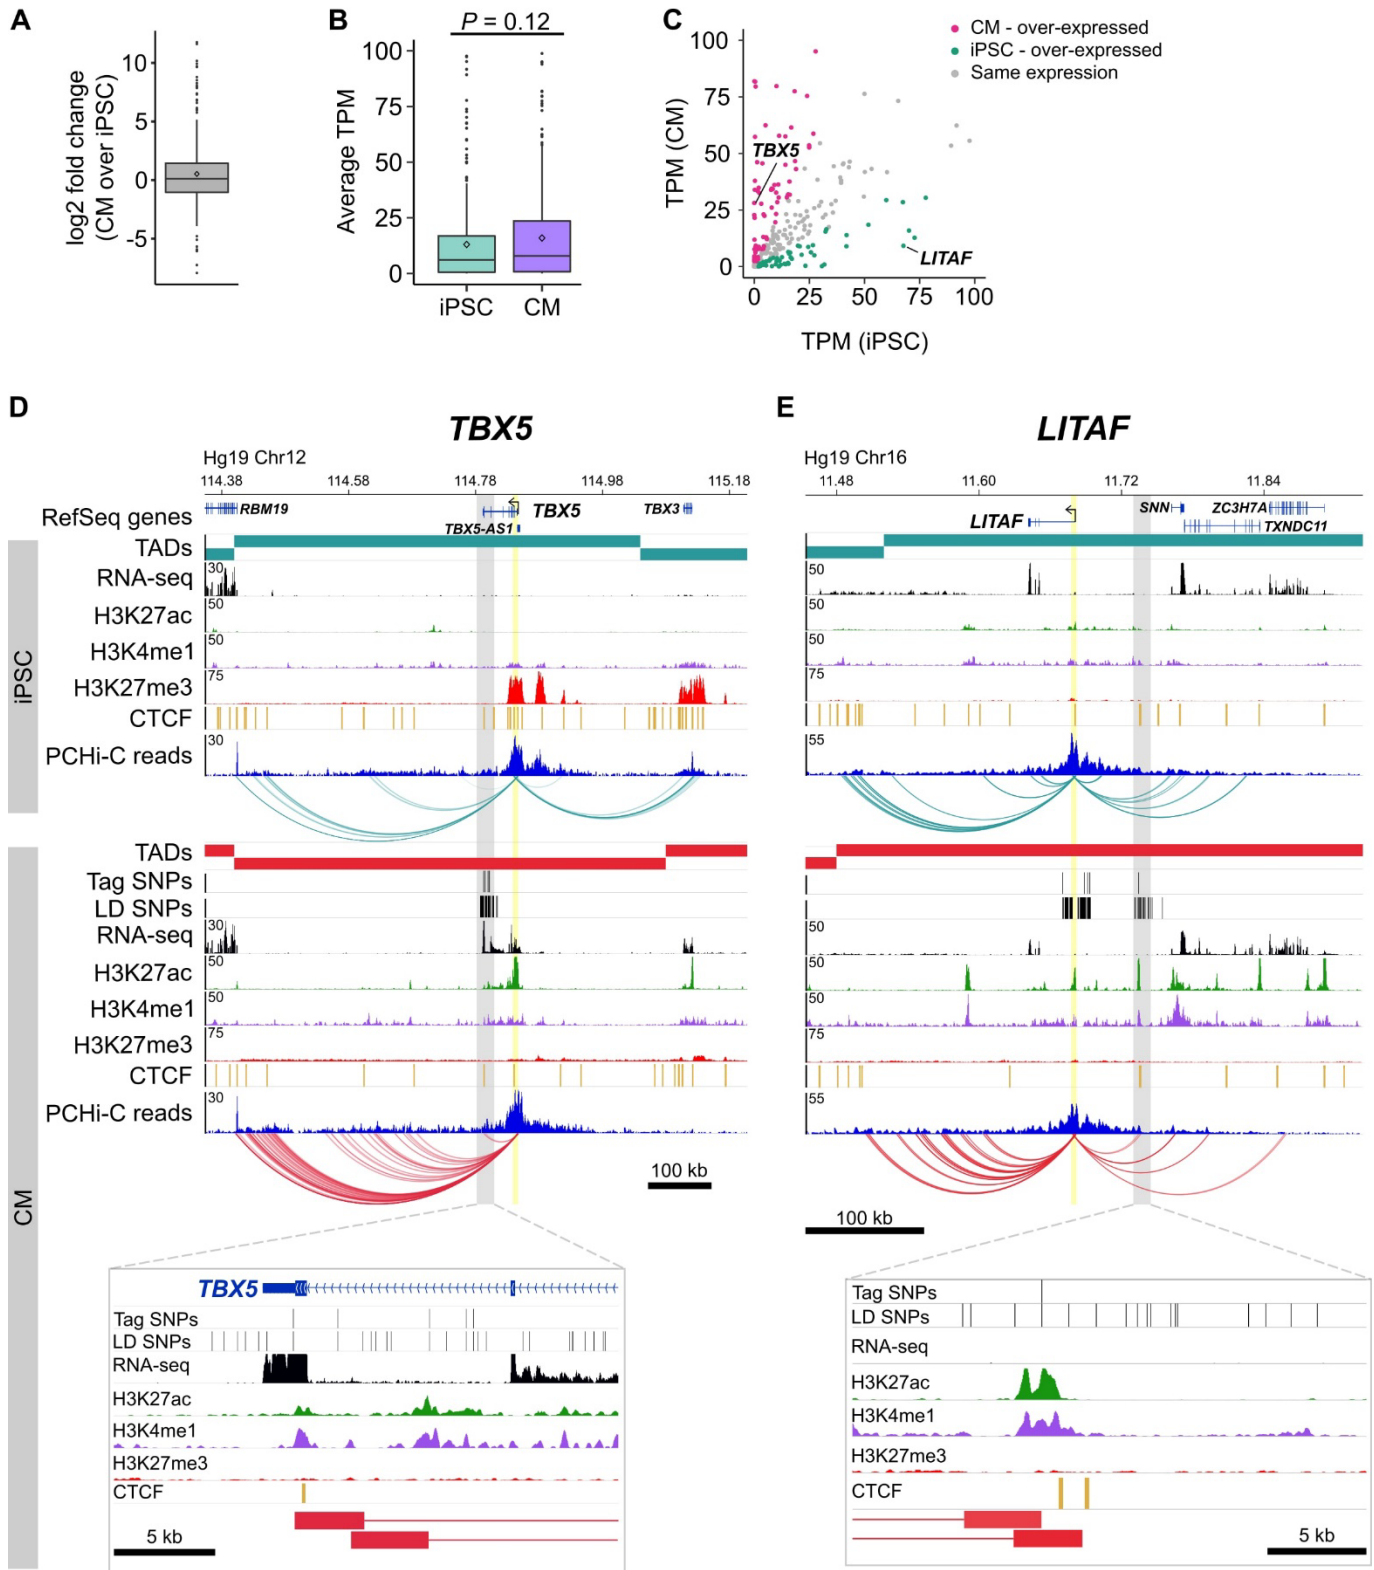

471



472 **Figure 6. Characterizing target genes based on expression level. (A)** Log<sub>2</sub> fold change of the  
473 expression level of target genes in CMs compared to iPSCs (horizontal bar indicates median, 1.08;  
474 diamond indicates mean, 1.44). **(B)** Average TPM values of target genes in iPSCs and CMs ( $P = 0.12$ ,  
475 Wilcoxon rank-sum test). Diamonds indicate the mean value (40.6 for iPSC, 60.1 for CM). **(C)**  
476 Comparison of average TPM values for target genes in CMs and iPSCs. See Supplementary File 8 for  
477 full list of genes and TPM values. **(D,E)** Examples of genes looping to cardiac arrhythmia GWAS SNPs  
478 in CMs. **(D)** The *TBX5* gene interacts with a functionally validated arrhythmia locus (Smemo et al.  
479 2012). **(E)** The *LITAF* gene interacts with a locus identified in (Arking et al. 2014). Yellow highlighted  
480 region indicates the promoter; gray box and zoom panel show the promoter-interacting regions  
481 overlapping arrhythmia SNPs. For clarity, only interactions for the indicated promoter are shown.

482

483 **CM promoter interactions are informative to cardiovascular associations that do not directly**  
484 **involve cardiomyocytes**

485 Because the three disease classes that we analyzed represent diverse pathologies, we  
486 predicted that the target genes identified for each class individually may relate to different biological  
487 processes. Specifically, we considered that cardiac arrhythmias – which directly result from defects in  
488 cardiomyocytes specialized for electrical conduction – may uncover the most cardiac-relevant target  
489 genes compared to heart failure and myocardial infarction, two CVDs that also involve non-cardiac  
490 systems. When broken down into the respective disease classes, we confirmed that the majority of the  
491 GO enrichment for cardiac terms was driven by the cardiac arrhythmia SNPs (Figure 7A), with terms  
492 directly related to the cardiac conduction system. Myocardial infarction (Figure 7B) and heart failure  
493 (Figure 7C) analyses uncovered a set of genes that were slightly enriched for regulation of growth and  
494 morphogenesis, respectively.

495 Despite these seemingly non-specific processes, each set of target genes contained important  
496 disease-relevant candidates. For example, one of the strongest associations for myocardial infarction  
497 lies in-between the *CELSR2* and *PSRC1* genes on chromosome 1p13, but a careful screen of genes  
498 whose expression was affected by the risk allele implicated the more distal *SORT1* gene (Musunuru et  
499 al. 2010). *SORT1* encodes a sorting receptor that is expressed in many tissues and has been shown to  
500 act in the liver to regulate cholesterol levels (Petersen et al. 1997; Musunuru et al. 2010). Despite

501 functioning in the liver, we identified multiple promoter interactions between *SORT1* and the myocardial  
502 infarction GWAS locus in CMs (Figure 7D), directly implicating *SORT1* as the target gene and lending  
503 further support to experimental validation of this locus as a *SORT1* enhancer (Musunuru et al. 2010).  
504 Additionally, the *ACTA2* gene is located 220 kb away from the heart failure GWAS locus proximal to the  
505 *CH25H* and *LIPA* genes on chromosome 10q21 (Smith et al. 2010) (Figure 7E). *ACTA2* encodes the  
506 smooth muscle cell-specific actin protein and mutations in this gene have been shown to cause  
507 coronary artery disease, among other vascular diseases (Guo et al. 2009). Despite its location at a  
508 considerable distance from the GWAS association, chromatin interactions provide an important level of  
509 evidence that *ACTA2* is a putative causal gene in the development of heart failure. Therefore, the CM  
510 interaction map is not only useful to interrogate diseases directly related to cardiomyocytes, as in the  
511 case of cardiac arrhythmias, but also aids interpretation of target genes that may act in non-cardiac  
512 tissues.

513

514

515

516

517

518

519

520

521

522

523

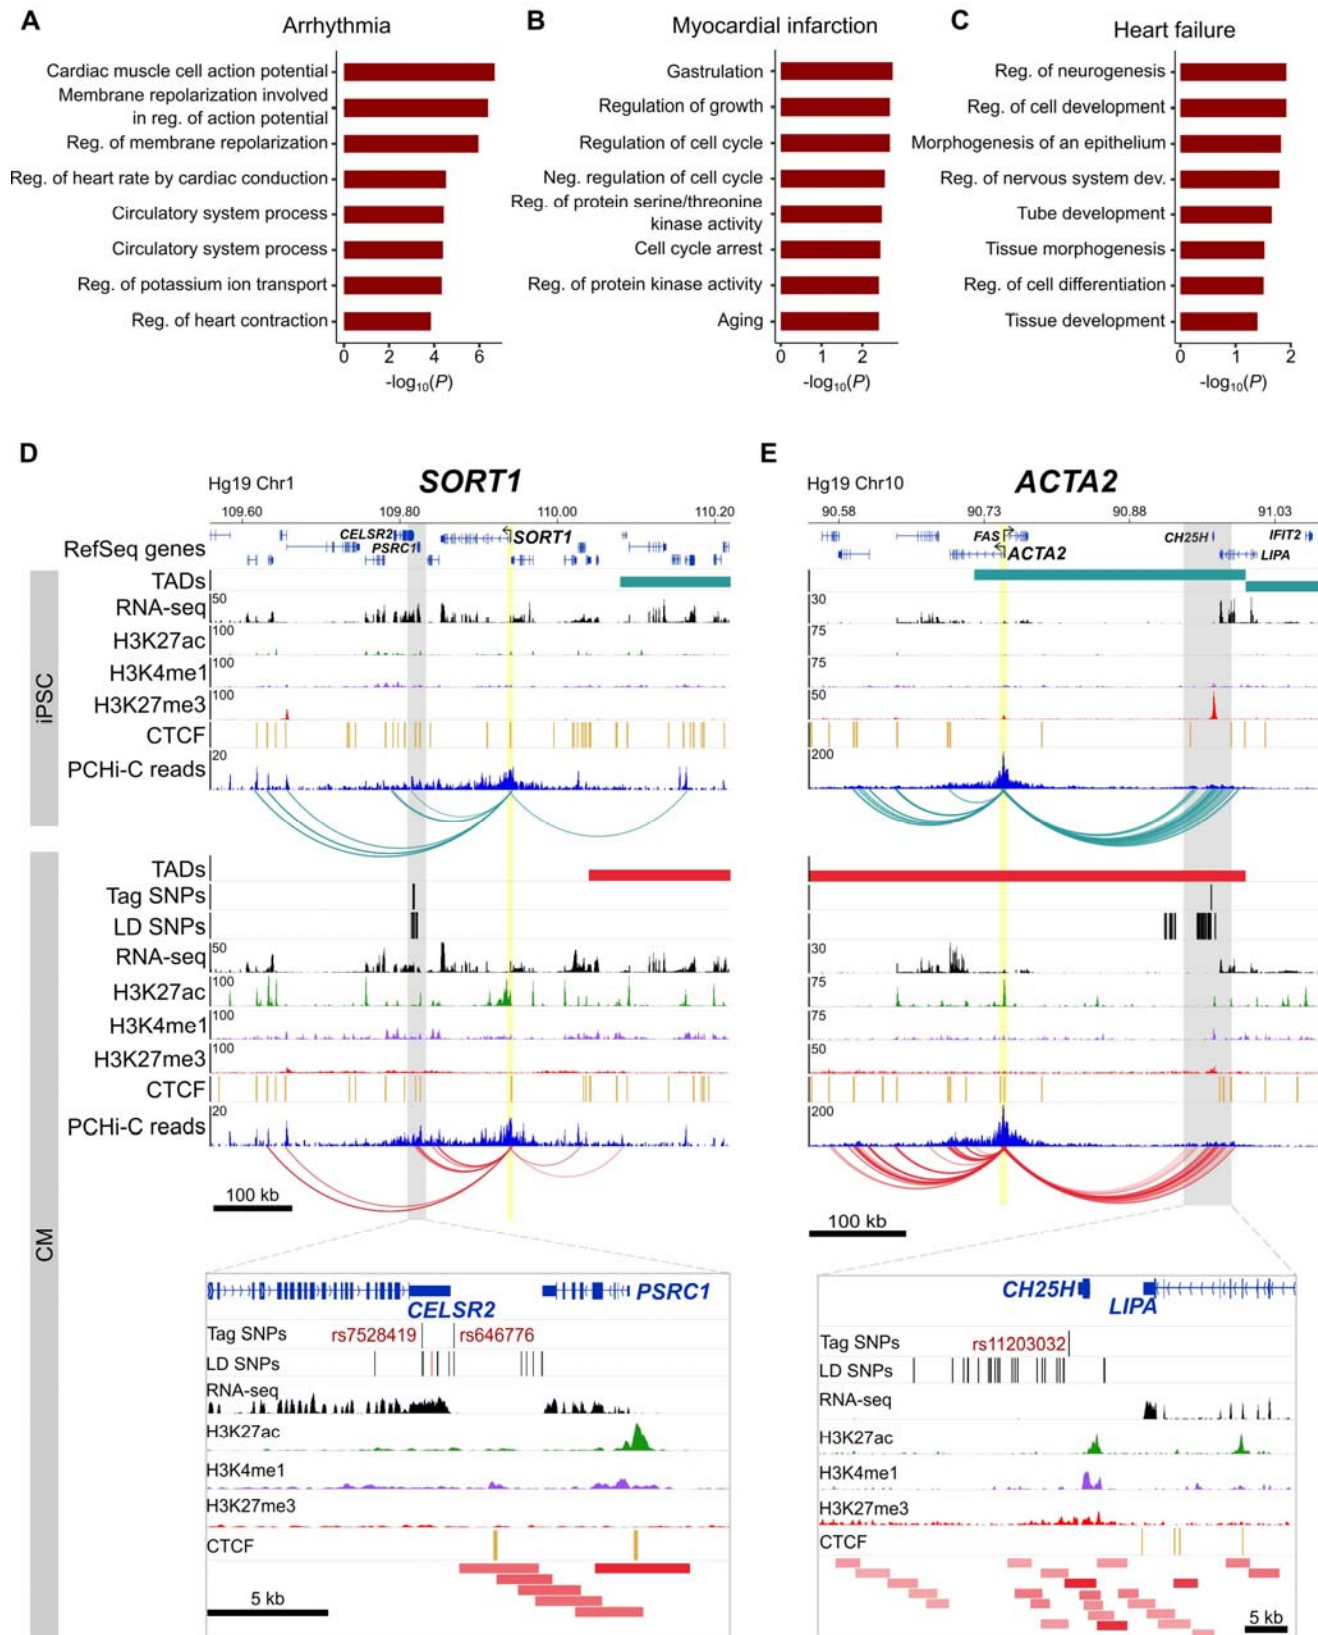

524

525 **Figure 7. Relevance of CM promoter interactions for cardiac arrhythmia, myocardial infarction**  
526 **and heart failure. (A-C)** Gene Ontology analysis for target genes looping to **(A)** cardiac arrhythmia  
527 SNPs, **(B)** myocardial infarction SNPs, and **(C)** heart failure SNPs. **(D)** The *SORT1* promoter loops to a  
528 distal myocardial infarction locus (Musunuru et al. 2010). The rs12740374 SNP shown to disrupt a  
529 C/EBP binding site in (Musunuru et al. 2010) is colored red. **(E)** The *ACTA2* promoter loops to the  
530 10q21 heart failure locus (Smith et al. 2010). Zoom plots depict the full interacting region overlapping  
531 GWAS LD SNPs. For clarity, only interactions for the indicated gene are shown.

532

## 533 Discussion

534 Incomplete understanding of long-range gene regulation is a major roadblock in the translation  
535 of GWAS-associated loci to disease biology. Major challenges in this process include identifying  
536 putatively causal variants mapping within regulatory elements and functionally connecting these  
537 regulatory elements to their target genes. To delineate gene-regulatory interactions between CVD-  
538 associated SNPs and putative causal genes, we generated high-resolution maps of promoter  
539 interactions in human iPSCs and iPSC-derived CMs. We demonstrated that promoters interact with a  
540 diverse set of distal DNA elements in both cell types, including known enhancer sequences, which  
541 reflect cell identity and correspond to tissue-specific gene expression. To demonstrate the utility of the  
542 CM map, we linked 1,999 CVD-associated SNPs to putative causal target genes which identified both  
543 validated and potentially novel genes important for cardiovascular disease biology. To validate the  
544 biological relevance of our maps, we addressed several important features of long-range chromatin  
545 interactions in comparative analyses.

### 546 *Promoters contact distal regions enriched for tissue-specific transcription factor motifs*

547 Gene regulation by distant regulatory elements involves the bridging of linearly separated DNA  
548 sequences, for example between a promoter and its distal enhancers, through chromatin looping  
549 mechanisms (Spitz and Furlong 2012). In support of this model, we report an enrichment of tissue-  
550 defining transcription factor motifs in the distally interacting sequences of differentially expressed  
551 promoters both for CMs and iPSCs, providing an important level of evidence to validate the functional

552 relevance of iPSC and CM interactions. One explanation for this enrichment is that our interaction maps  
553 are high resolution. We generated Hi-C libraries with the 4-bp cutter Mbol, which generates fragments  
554 with an average size of 422 bp; this increased specificity of the captured region likely leads to better  
555 resolution of the underlying enhancer sequence and, consequently, increased power to detect short  
556 transcription factor binding motifs.

### 557 *Influence of active and repressive promoter interactions on gene expression level*

558 The majority of capture Hi-C studies to date have reported that gene expression level correlates  
559 with enrichment for various histone marks. We observed the same trend in our data, with highly  
560 expressed genes exhibiting strong enrichment for looping to distal H3K4me1 and H3K27ac-marked  
561 regions, and lowly expressed genes exhibiting strong enrichment for looping to H3K27me3-marked  
562 regions. These data are consistent with a model in which the number of long-range interactions to  
563 enhancers or repressors additively contributes to gene expression level (Schoenfelder et al. 2015;  
564 Javierre et al. 2016). The forces that drive increased association between promoters and distal *cis*-  
565 regulatory elements are not completely understood and have been topics of investigation in the  
566 genome organization and chromatin biology fields for several years (Dekker and Mirny 2016; Calo and  
567 Wysocka 2013). One possibility is that this increasing enrichment is driven by genomic  
568 compartmentalization of active and inactive chromatin. We showed that a gene's expression level  
569 correlates with the number of histone ChIP-seq peaks within a large window (300 kb) surrounding each  
570 promoter. Thus, highly expressed genes are more likely to contact active chromatin regions compared  
571 to lowly expressed genes, corresponding to the observed increasing enrichment we and others have  
572 reported. This local increase in active or repressive chromatin may be one driving force underlying the  
573 expression level-dependent increase in association between promoters and *cis*-regulatory elements,  
574 akin to a phase separation-mediated model of enhancer-promoter interactions (Hnisz et al. 2017).

### 575 *A promoter interaction map for cardiovascular disease genetics*

576 We demonstrated several ways in which promoter interaction data can be used to better  
577 understand disease genetics, specifically addressing the major requirement for a high-resolution map of  
578 the gene-regulatory network in human cardiomyocytes. Although iPSC-derived CMs are known to be  
579 relatively immature and do not fully reflect the diverse structural and functional aspects of adult cardiac  
580 cells (Gherghiceanu et al. 2011; Karakikes et al. 2015), the difficulty in obtaining pure sub-populations  
581 of primary cardiomyocytes with high integrity necessitates the use of an *in vitro* system. We showed  
582 that the CMs used in this study were highly pure and recapitulate known gene regulatory properties of  
583 primary cardiomyocytes. Because of this purity, we were able to integrate CVD-associated SNPs with  
584 CM promoter interactions with high confidence, assigning nearly 20% of the variants in high LD with  
585 these associations to 347 target genes.

586 Supporting the physiological relevance of CMs to the cardiac conduction system, we found that  
587 target genes were most relevant for GWAS loci associated with cardiac arrhythmias, in line with  
588 previous findings in immune cells that many target gene interactions were unique to relevant immune  
589 cell subtypes (Javierre et al. 2016; Mumbach et al. 2017). Our data also revealed that even for  
590 diseases whose etiology involves cell types other than cardiomyocytes, such as myocardial infarction  
591 and heart failure, we identified interactions involving loci associated with these diseases that  
592 recapitulate the enhancer-promoter interactions in non-cardiac cell types. As an example, we showed  
593 that a validated myocardial infarction locus interacts with the distal *SORT1* promoter in CMs even  
594 though this locus has been extensively characterized in the context of cholesterol metabolism in  
595 hepatocytes. Therefore, the promoter interactions we observe linking the disease locus to *SORT1* may  
596 represent tissue-invariant genome architecture, likely reflecting that genome organization in general is  
597 relatively stable (Dixon et al. 2015; Jin et al. 2013; Ghavi-Helm et al. 2014). While we advocate the use  
598 of the CM map for investigating gene regulatory mechanisms of diseases related to cardiomyocyte  
599 biology, we also emphasize that, where identified, any interaction between a promoter and a putative

600 disease-associated genomic region serves as an important level of evidence to prioritize that gene for  
601 future follow-up studies.

### 602 *Limitations of the PCHi-C maps*

603 The PCHi-C technique holds great promise to identify with high resolution and throughput all  
604 regulatory elements for all genes in any tissue or developmental stage of interest. However, due to  
605 technical and biological limitations, there are important caveats to PCHi-C that should be considered  
606 when interpreting the iPSC or CM interaction data. The most important caveat is that there are likely to  
607 be many false negatives, or “missing” interactions. Although the capture step greatly enriches for  
608 promoter-containing ligation fragments in a Hi-C library, the total landscape of promoter contacts in a  
609 population of cells is still under-sampled, even with a sequencing depth of ~400M reads per replicate  
610 conducted for this study. This is due to several factors, including the hybridization efficiency of each  
611 bait, ability to design sufficient baits per promoter, and the transient nature of many regulatory  
612 interactions. This latter issue is confounded by the distance-dependent effect on ligation frequency: as  
613 the distance between two fragments increases, the read-depth required to robustly identify that  
614 interaction also increases. Because many regulatory elements are located far from their target gene(s),  
615 very deep sequencing is required to identify them with high confidence. The feasibility of deeper  
616 sequencing and modifications to computational pipelines will continue to improve the coverage and  
617 resolution of Hi-C data. Nevertheless, the data sets we provide here represent a highly enriched set of  
618 ~350,000 and ~400,000 promoter interactions in iPSC and CMs, respectively; although there are likely  
619 missing interactions, the interactions that we did identify should be considered as very high confidence,  
620 as they were independently identified in at least two biological replicates and show strong signal of  
621 enrichment for known features of genome architecture and gene regulation.

622 In conclusion, the promoter interaction maps we generated in this study represent important  
623 resources for any investigation into the gene regulatory mechanisms underlying cardiovascular disease  
624 traits. The list of candidate regulatory variants and their target genes may serve as an entry point for

625 several hypotheses related to CVD GWAS, and can be readily tested in experimental settings. To  
626 provide both the iPSC and CM maps as an accessible resource, we have hosted the full set of data  
627 presented in this study at the WashU EpiGenome Browser. Additionally, we provide the significant  
628 PChi-C interaction files used in all analyses in the Supplementary Material (Supplementary Files 1 and  
629 2); these can be applied to future multi-omics analyses of gene regulation and disease genetics.

630

## 631 **Methods**

### 632 ***Tissue culture of iPSCs***

633 We used the Yoruban iPSC line 19101, kindly provided by the laboratory of Yoav Gilad. This  
634 iPSC line was reprogrammed from lymphoblastoid cells as part of a previous study, where it was shown  
635 to differentiate into all three germ layers, displayed a normal karyotype, and expressed markers  
636 characteristic of pluripotency (Banovich et al. 2018). iPSCs were grown in Essential 8 (E8) Medium  
637 (Thermo Fisher #A1517001) supplemented with 1X Penicillin-Streptomycin (Pen/Strep, Gibco) on  
638 Matrigel-coated tissue culture dishes (Corning #354277). Cells were passaged when they were ~80%  
639 confluent using enzyme-free dissociation solution (30mM NaCl, 0.5mM EDTA, 1X PBS minus  
640 Magnesium and Calcium) and maintained in E8 Medium with 10 $\mu$ M Y-27632 dihydrochloride (Abcam  
641 #ab120129) for 24 hours. Medium was replaced daily. iPSC cultures routinely tested negative for  
642 mycoplasma contamination using the Universal Mycoplasma Detection Kit (ATCC #30-1012K).

### 643 ***Cardiomyocyte differentiation***

644 Cardiomyocyte differentiations were based on the protocol of Burridge *et al.* (Burridge et al.  
645 2014) with modifications described in Banovich *et al.* (Banovich et al. 2018). iPSCs were expanded in  
646 60 mm dishes in E8 media until they reached 60-70% confluency at which time the differentiation was  
647 started (day 0). On day 0, E8 media was replaced with 10mL of basic heart media/12 $\mu$ M GSK-3  
648 inhibitor CHIR-99021 trihydrochloride (Tocris #4953)/Matrigel overlay [basic heart media: RPMI 1640



649 minus L-glutamine (HyClone #SH30096.01) with 1X GlutaMax (Life Technologies #11879020)  
650 supplemented with 1X B27 minus insulin (Thermo Fisher #A1895601) and 1X Pen/Strep; Matrigel  
651 overlay was accomplished by dissolving Matrigel in 50mL basic heart media at a concentration of 0.5X  
652 according to the lot-specific dilution factor]. After 24 hours (day 1), the GSK-3 inhibitor was removed by  
653 replacing media with 10 mL basic heart media. On day 3, media was replaced with 10 mL basic heart  
654 media supplemented with 2  $\mu$ M Wnt-C59 (Tocris #5148). On day 5 (48 hours later), media was  
655 replaced with 10 mL basic heart media. On day 7, cells were washed once with 1X PBS and then 15  
656 mL basic heart media was added. Media was replaced every other day in this way until day 15 at which  
657 time cardiomyocytes were selected for by replacing basic heart media with 10mL lactate media (RPMI  
658 1640 minus D-glucose, plus L-glutamine (Life Technologies #11879020), supplemented with 0.5 mg/mL  
659 recombinant human albumin (Sigma 70024-90-7), 5 mM sodium DL-lactate (Sigma 72-17-3), 213  
660  $\mu$ g/mL L-ascorbic acid 2-phosphate (Sigma 70024-90-7) and 1X Pen/Strep). Lactate media was  
661 replaced every other day until day 20 at which point cardiomyocytes were harvested. Cells from  
662 successful differentiations exhibited spontaneous beating around days 7-10.

663           Cardiomyocytes were harvested by washing once with 1X PBS followed by incubation in 4 mL  
664 TrypLE (Life Technologies 12604-021) at 37°C for 5 minutes. After incubation, 4 mL lactate media was  
665 added to the TrypLE and a 1 mL pipet was used to dislodge cells. Cells were strained once with a  
666 100 $\mu$ M strainer and then once with a 40 $\mu$ M strainer. Cells were pelleted at 500xg and then  
667 resuspended in PBS and counted. For each batch of differentiation, 5 million cells were taken for  
668 promoter-capture Hi-C and 1 million cells were taken for RNA-seq. To assess purity, 2 million cells  
669 were taken for flow cytometry analysis using an antibody for cardiac Troponin T (BD Biosciences  
670 564767). All cells used in downstream experiments were at least 86% Troponin T positive (Figure 1—  
671 figure supplement 1A). We carried out three independent differentiations of the same iPSC line and  
672 generated promoter-capture Hi-C and RNA-seq libraries in iPSCs and CMs from each triplicate.

673 ***Promoter capture Hi-C***

674 **-Crosslinking cells**

675 iPSCs or cardiomyocytes were harvested from tissue culture dishes and counted. Cells were  
676 resuspended in 1X PBS at a concentration of 1 million cells/mL and 37% formaldehyde was added to a  
677 final concentration of 1%. Crosslinking was carried out for 10 minutes at room temperature on a rocking  
678 platform. Glycine was added to a final concentration of 0.2 M to quench the reaction. The cells were  
679 pelleted, snap frozen in liquid nitrogen and stored at -80°C until ready for Hi-C processing.

680 **-in situ Hi-C**

681 We prepared all promoter capture Hi-C libraries in one batch using three crosslinked pellets of 5  
682 million cells for both iPSCs and iPSC-derived cardiomyocytes, representing three independent  
683 cardiomyocyte differentiations. The *in situ* Hi-C step was performed as in Rao *et al.* (Rao et al. 2014)  
684 with a single modification in which NEBNext reagents from the NEBNext Multiplex Oligos for Illumina kit  
685 were used (NEB #E7335S) instead of Illumina adapters, following the manufacturer's instructions. Hi-C  
686 libraries were amplified directly off of T1 beads (Life Technologies #65602) using NEBNext primers and  
687 6 cycles of PCR.

688 **-Promoter capture – probe design and generation**

689 Hi-C capture probes were designed to target four Mbol restriction fragment ends (120 bp) near  
690 the TSS of protein coding RefSeq genes (O'Leary et al. 2016) mapped to hg19 in the UCSC Genome  
691 Browser (Speir et al. 2016). To select restriction fragments, we only kept Mbol restriction fragments  
692 longer than 200 bp and overlapping 10 kb around a RefSeq TSS. TSSs closer than 1 kb from each  
693 other were excluded, as their interactions were likely to be captured by the other RefSeq TSS. The four  
694 Mbol restriction fragments ends closest to each RefSeq TSS were selected as putative probes. The  
695 120 bp sequences were submitted to Agilent's SureDesign proprietary software for probe selection,  
696 which can slightly shift the location and remove probes. In total, we ordered a library of 77,476 single-  
697 stranded DNA oligos from CustomArray, Inc. ([www.customarrayinc.com](http://www.customarrayinc.com)). Each oligo consisted of the

698 sequence 5'-ATCGCACCAGCGTGTN<sub>120</sub>CACTGCGGCTCCTCA-3' (Gnirke et al. 2009) where N<sub>120</sub>  
699 represents the 120 nucleotides adjacent to the Mbol cut site. The complete list of oligo probes and  
700 their corresponding gene name is provided in Supplementary File 9.1.

701 The oligos arrived as a pool containing 1000 ng of material. We used 16 ng of the oligo pool in a  
702 PCR reaction to make them double stranded using primers 5'-CTGGGAATCGCACCAGCGTGT-3'  
703 (Primer A), and 5'-CGTGGATGAGGAGCCGCAGTG-3' (Primer B) as in (Gnirke et al. 2009). The PCR  
704 reaction was cleaned using AMPure XP beads (Agencourt #A6388) and eluted with 20µl of water. To  
705 add the full T7 promoter to the 5' end of the oligos, a second PCR reaction was carried out using 10ng  
706 of the cleaned-up first-round PCR product with the forward primer 5'-  
707 GGATTCTAATACGACTCACTATAGGGATCGCACCAGCGTGT-3' (Primer A T7). We purified the PCR  
708 product corresponding to 176 bp using a Qiagen gel extraction kit (#28704). To generate biotinylated  
709 RNA baits, we performed *in vitro* transcription on the double-stranded library using the  
710 MEGAshortscript T7 Transcription Kit (Thermo Fisher #AM135) with Biotin-16-dUTP (Sigma  
711 #11388908910). After DNase treatment the transcription reaction was cleaned using the MEGAclean kit  
712 (Thermo Fisher #AM1908) and eluted with 50µl elution buffer. We confirmed the correct bait size on a  
713 denaturing gel.

#### 714 ***-Promoter capture – hybridization with Hi-C library***

715 To isolate promoter-containing fragments from the whole-genome *in situ* Hi-C library, we  
716 hybridized the biotinylated RNA bait pool with the Hi-C library as follows. A mix containing 500ng of the  
717 Hi-C library, 2.5µg of human Cot-1 DNA (Invitrogen #15279-011), 2.5µg of salmon sperm DNA  
718 (Invitrogen #15632-011), 0.5µl blocking primer P5 (IDT #1016184), and 0.5µl blocking primer P7 (IDT  
719 #1016186) was heated for 5 min. at 95°, held at 65° and mixed with 13µl pre-warmed hybridization  
720 buffer (10X SSPE, 10X Denhardt's, 10 mM EDTA and 0.2% SDS) and a 6 µl pre-warmed mix of 500ng  
721 of the biotinylated RNA bait and 20U SUPERase-In (Thermo Fisher #AM2694). The hybridization mix

722 was incubated for 24h at 65°C. To isolate captured fragments, we prepared 500ng of streptavidin-  
723 coated magnetic beads (Dynabeads MyOne Streptavidin T1, Thermo Fisher #65601) in 200µl of  
724 Binding buffer (1M NaCl, 10mM Tris-HCl pH 7.5, 1mM EDTA). The hybridization mix was added to the  
725 Streptavidin beads and rotated for 30 minutes at room temperature. The beads containing the captured  
726 Hi-C fragments were washed with 1X SSC, 0.1% SDS for 15 minutes at room temperature, followed by  
727 three washes (10 min each) at 65°C with 0.1X SSC/0.1% SDS. After the final wash, the beads were  
728 resuspended in 22µl of water and proceeded to post-capture PCR. The PCR reaction was performed  
729 with 11µl of the “capture Hi-C beads” and 8 cycles of amplification. An AMPure XP bead purification  
730 was used to clean the PCR reaction and DNA was quantified using the QuantiFluor dsDNA System  
731 (Promega #E2670) and a High Sensitivity Bioanalyzer. Final capture Hi-C libraries were subjected to  
732 100bp paired-end sequencing on an Illumina HiSeq 4000 machine. Read count summaries are  
733 provided in Supplementary File 9.2.

### 734 ***Interaction calling***

735 We used HiCUP v0.5.9 (Wingett et al. 2015) to align and filter Hi-C reads (total and filtered read  
736 counts are presented in Supplementary File 9.2). Unique reads were given to CHiCAGO version 1.2.0  
737 (Cairns et al. 2016) and significant interactions were called with default parameters. In this study, we  
738 focused exclusively on *cis*-interactions as the evidence that *trans*-chromosomal interactions contribute  
739 to gene expression regulation is limited. CHiCAGO reports interactions for each captured restriction  
740 fragment; to summarize interactions by gene, we considered the interval spanning all captured Mbol  
741 fragments (i.e. the set of probes spanning each TSS) as the promoter region ("merged TSS"). This  
742 means the promoter regions created have variable lengths. In cases where multiple genes were  
743 annotated to the same promoter region, we report the interaction for each gene individually. This  
744 annotation allowed us to perform gene-level analyses, for example based on expression level. We  
745 removed this redundancy as necessary, for example in motif enrichment analyses of the promoter-  
746 interacting fragments. Using the "merged TSS" interaction files, we filtered interactions to retain those

747 that mapped within 1kb of each other in at least two replicates. Specifically, we extended each  
748 promoter-interacting fragment by 1kb on each end and then used BEDTools (Quinlan and Hall 2010)  
749 pairToPair functionality to identify interactions where both ends matched across replicates. To identify  
750 cell type-specific interactions, we required that the interaction (with the 1 kb extension) was not present  
751 in any of the three replicates of the other cell type. The number of read-pairs per promoter and the  
752 corresponding number of significant interactions identified is presented in Supplementary File 9.3. The  
753 TAD analyses, motif enrichment, CHIP-seq peak enrichment, and eQTL analyses (related to Figures 1,  
754 2, 3 and 5) were conducted with fragment-level interactions (no 1kb extension). The GWAS SNP  
755 analyses were conducted with 1kb-extended interactions, as we aimed to be as inclusive as possible  
756 when linking CVD SNPs to target genes.

#### 757 ***4C-style plots***

758 To generate the by-gene read counts displayed in the genome-browser figures, all read-pairs  
759 mapping to captured Mbol fragments for a given promoter were summed across replicates. Specifically,  
760 we summed reads for each Mbol fragment where the read was part of a paired-read that mapped to a  
761 bait for the given gene. The arcs that are displayed underneath the 4C-style plot represent significant  
762 interactions that were identified in at least two replicates as detailed above in “Interaction calling”.

#### 763 ***TAD analysis***

764 To identify TADs, we pooled reads across replicates for each cell type using the pre-capture Hi-  
765 C data (600M reads for iPSC and 733M reads for CM) and used HiCUP v0.5.9 (Wingett et al. 2015) to  
766 align and filter Hi-C reads. HOMER v4.8.3 (Heinz et al. 2010) was used to generate normalized  
767 interaction matrices at a resolution of 40 kb and then TopDom v0.0.2 (Shin et al. 2016) was used with a  
768 window size  $w=10$  to identify topological domains, boundaries and gaps. We only considered domains  
769 for the analyses in this paper. We considered a promoter capture Hi-C interaction to be “intra-TAD” if

770 the entire span of the interaction was fully contained in a single domain. “Inter-TAD” interactions are  
771 defined as interactions where each end maps to a different domain.

### 772 ***A/B compartments***

773 The program runHiCpca.pl from the HOMER (Heinz et al. 2010) v4.8.3 package was used to  
774 call A/B compartments with -res 50000 for both whole-genome and capture Hi-C data.

### 775 ***RNA-seq***

776 Total RNA was extracted from flash-frozen pellets of 1 million cells using TRI Reagent (Sigma  
777 #T9424) and a homogenizer followed by RNA isolation and clean-up using the Direct-zol RNA Kit  
778 (Zymo Research #11-331). RNA-seq libraries were generated with the Illumina TruSeq V2 kit (Illumina,  
779 RS-122-2001) and 1µg of RNA, following manufacturer’s instructions. Libraries were made from RNA  
780 isolated from three independent iPSC-CM differentiations (triplicates of iPSC and of cardiomyocytes).  
781 Libraries were sequenced on an Illumina HiSeq 4000.

782 Gene counts were quantified with Salmon 0.7.2 (Patro et al. 2017) and imported with tximport  
783 1.2.0 (Soneson et al. 2015) into DESeq2 1.12.4 (Love et al. 2014) to call differentially expressed genes.  
784 A minimum 1.5-fold-difference between CMs and iPSC triplicates and a minimum adjusted P-value of  
785 0.05 were required to select differentially expressed genes for downstream analyses. TPMs (transcripts  
786 per million) were also estimated by Salmon. Because the samples clearly clustered according to their  
787 known tissues of origin (Figure 1 – figure supplement 2A), no correction for batch effects was  
788 performed.

### 789 ***H3K27ac ChIP-seq for comparison with Epigenome Roadmap samples***

790 We performed ChIP-seq on 2.5 million cells each for iPSCs and CMs using H3K27ac antibodies  
791 (Wako #306-34849). Briefly, cells were crosslinked with 1% formaldehyde for 10 minutes at room  
792 temperature, quenched with 0.2M glycine for 5 minutes, pelleted and snap-frozen in liquid nitrogen.  
793 Cells were lysed in Lysis Buffer 1 (50 mM HEPES-KOH, pH 7.5, 140 mM NaCl, 1 mM EDTA, 10%

794 glycerol, 0.5% NP-40, 0.25% Triton X-100). Crosslinked chromatin was sheared to an average size of  
795 300 bp using a Bioruptor with 30" on/30" off at high setting and then incubated overnight at 4°C with 1  
796 µg antibody. Dynabeads M-280 Sheep Anti-Mouse IgG (ThermoFisher #11201D) were used to pull  
797 down chromatin and ChIP DNA was eluted and prepared for sequencing using the NEBNext Ultra II  
798 DNA Library prep kit (NEB #E7645S). ChIP-seq reads were aligned with Bowtie 2-2.2.3 (Langmead  
799 and Salzberg 2012) and peaks were called with HOMER (Heinz et al. 2010) v4.8.3 on unique reads  
800 with mapping quality > 10 using the –region and –style histone parameters. Significant peaks were  
801 overlapped with H3K27ac peaks from Epigenome Roadmap samples which demonstrated high  
802 concordance between matched tissue types (Figure 1—figure supplement 2C,D). Because we  
803 performed a low level of sequencing, we did not identify as many peaks as the Roadmap samples.  
804 Therefore we used Roadmap ChIP-seq data in all of our analyses.

### 805 ***Gene Ontology analysis***

806 The human Gene Ontology (GO) associations of GO terms (Ashburner et al. 2000) to genes  
807 and the GO database were downloaded on January 22, 2016 from [http://geneontology.org/gene-](http://geneontology.org/gene-associations)  
808 [associations](http://geneontology.org/gene-associations). GO terms were associated with RefSeq genes via gene symbols. Using the GO  
809 annotation graph, all parent terms were assigned to the terms annotated to a gene. A hypergeometric  
810 test was used to calculate the statistical significance of the difference of the number of genes  
811 associated with a given GO term in a particular gene set and the universe of all RefSeq genes ( $P <$   
812 0.05). P-values were corrected with the R package p.adjust function using the “fdr” method.

813 For two of the GWAS disease groups (heart failure and myocardial infarction), the list of genes  
814 looping to LD SNPs included many histone genes. This is because there is a tag SNP located in the  
815 middle of a histone gene cluster (containing > 30 histone genes located close together) in each case.  
816 After expanding the tag SNP to all SNPs in LD, many of the histone genes in that cluster looped to the  
817 LD SNPs, resulting in a high representation of these genes in the final gene list. The resulting Gene  
818 Ontology enrichment analysis gave terms relating to nucleosome and chromatin organization because

819 of this over-representation. We therefore chose to remove these genes from the final gene lists of heart  
820 failure and myocardial infarction target genes.

### 821 ***Motif analysis***

822 The program findMotifsGenome.pl from the HOMER (Heinz et al. 2010) v4.8.3 package was  
823 used with `-size given` parameter to identify overrepresented motifs in the distal (non-promoter)  
824 interacting sequences of promoter interactions. As stated above, this analysis was performed on  
825 fragment-level promoter-interacting sequences.

### 826 ***Histone ChIP-seq enrichment analysis***

827 We obtained publicly available ChIP-seq data in the form of processed peak calls for H3K27ac,  
828 H3K4me1 and H3K27me3 from the Roadmap Epigenomics Project (Roadmap Epigenomics  
829 Consortium et al. 2015), and for CTCF from ENCODE (ENCODE Project Consortium 2012)  
830 (Supplementary File 10). We only considered peaks that mapped outside of the captured region of  
831 promoters to ensure our results were not driven by the strong peak signal over most promoters. As a  
832 proxy for iPSCs, we used data from the H1 embryonic stem cell line and for CMs we used data from  
833 Left Ventricle tissue. We grouped genes into five expression categories based on the average TPM  
834 values: group 1 (0 TPM), group 2 (TPM 0-3), group 3 (TPM 3-25), group 4 (TPM 25-150) and group 5  
835 (TPM >150) and for each group of genes, we calculated the enrichment for promoter interactions to  
836 overlap a given feature. To calculate enrichment of interactions overlapping an epigenetic feature, we  
837 compared the observed proportion of Mbol fragments in significant interactions overlapping a feature to  
838 the proportion of random Mbol fragments overlapping the feature. Specifically, we randomly selected  
839 Mbol fragments from a set that excluded fragments mapping within captured regions (promoters) or  
840 within unmappable genomic regions (gaps). The number of randomly selected fragments matched the  
841 number of interacting fragments considered for the analysis. We performed 100 iterations of  
842 overlapping random fragments with a feature and report the average fold-enrichment. We refer to this



843 method of enrichment as a “genome-wide” background model because for each gene expression  
844 group, the observed proportion of fragments containing a peak is compared to randomly selected  
845 fragments from the whole genome.

846 To calculate the correlation between expression and histone ChIP-seq peak density, we  
847 calculated the Spearman’s rank correlation between the expression value for each gene (the average  
848 TPM value) and the number of peaks mapping within 300 kb of each gene TSS. We only considered  
849 genes with at least one significant interaction in the respective cell type to allow for generalizations to  
850 the enrichment analysis presented in Figure 3.

### 851 ***GWAS analysis***

852 We compiled genome-wide significant SNPs associated with GWAS for cardiac arrhythmia, heart  
853 failure, and myocardial infarction from the NHGRI-EBI database (<http://www.ebi.ac.uk/gwas/>); see  
854 Supplementary File 7 for list of terms used to identify specific GWAS. We expanded each set of SNPs  
855 to all SNPs in high LD ( $r^2 > 0.9$ ) using phase 3 data of the 1,000 genomes project (Nikpay et al. 2015)  
856 (Supplementary File 3). For each lead SNP from the GWAS we analyzed, we selected a 100 kb interval  
857 centered on the SNP (SNP +/- 50kb). For each 100 kb interval, Tabix (Li 2011) was used to retrieve  
858 genotypes. We then used PLINK (Purcell et al. 2007) v1.90p on phase 3 data from the 1,000 genomes  
859 project (Nikpay et al. 2015) (<ftp://1000genomes.ebi.ac.uk/vol1/ftp/release/20130502>, v5a) to select SNPs  
860 in LD ( $r^2 > 0.9$ ) with the tag SNP and a minimum allele frequency of 0.01. We only included the  
861 populations primarily studied in the GWASs: CEU (central European), ASW (African American) and  
862 JPT (Japanese). We assigned all SNPs in promoter-distal interactions to their interacting gene(s)  
863 (“target genes”) using cardiomyocyte promoter capture Hi-C data. We did not require the SNP to map  
864 to regions associated with open chromatin or enhancer marks as these types of data are highly cell-  
865 type specific and we did not wish to exclude SNPs in regions that may be active in non-assayed cell  
866 types.

867 We note that one major GWAS for dilated cardiomyopathy was not included in the NHGRI-EBI  
868 database (Meder et al. 2014), likely because there is an error obtaining the online methods of the  
869 paper. After careful inspection of the study, we concluded that the GWAS met the NHGRI-EBI criteria  
870 and included the associations from that study in our analysis. A complete list of all studies used in this  
871 analysis can be found in Supplementary File 8.

### 872 ***MGI analysis***

873 To calculate enrichment of target genes to cause cardiovascular phenotypes when deleted in  
874 mice (Mouse Genome Informatics database), we randomly selected 347 genes from the list of starting  
875 genes (i.e. genes with at least one promoter-distal interaction in CMs, meaning it could be a target  
876 gene), and calculated the proportion that caused a cardiovascular phenotype in mice. We performed  
877 this randomized selection for 100 iterations to generate the randomized (expected) values. Random  
878 genes were not required to be expressed, as the set of target genes contains genes that are not  
879 expressed. P-value was calculated with a Z test.

### 880 ***eQTL analysis***

881 For eQTLs used in comparisons with GWAS variants and Hi-C interactions, we used the set of  
882 GTEx v7 eQTLs identified as significant in the left ventricle of the heart (Carithers et al. 2015). eQTLs  
883 were called significant if  $q < 0.05$  after false discovery rate correction (Storey and Tibshirani 2003). We  
884 only considered promoter-distal eQTLs that were at least 10 kb from their associated gene to allow for  
885 that eQTL to map to an interaction with it's associated gene.

886 To calculate enrichment for eQTLs to loop to their associated gene, we used a background  
887 model whereby each promoter's set of interactions were re-mapped to a different promoter, keeping the  
888 distance and strand orientation consistent. We performed this re-mapping of all promoter interactions  
889 1000 times and calculated the proportion of all eQTLs that mapped to interactions for their eQTL-

890 associated gene in each permutation. We either used the CM interactions or the iPSC interactions with  
891 the same set of left ventricle eQTLs to compare cell-type specificity of the promoter interaction data.

#### 892 **Data Availability:**

893 Raw and processed sequencing data are provided at ArrayExpress through accession numbers E-  
894 MTAB-6014 (Hi-C) and E-MTAB-6013 (RNA-seq).

#### 895 **Acknowledgements**

896 We kindly thank the laboratory of Yoav Gilad for providing the iPSC line and assisting with the  
897 cardiomyocyte differentiation protocol, and Dr. Kohta Ikegami for assistance with the ChIP-seq protocol.

#### 898 **Competing Interests**

899 None

#### 900 **Sources of Funding**

901 This work was supported by NIH grants HL123857 (M.A.N.), HL119967 (M.A.N.), HL118758 (M.A.N.),  
902 HL128075 (M.A.N. and E.M.M.), T32GMOO7197 (L.E.M.), American Heart Association Pre-doctoral  
903 award 17PRE33410726 (L.E.M.), HL137307 (L.E.M).

904

#### 905 **References**

906 Arking DE, Pulit SL, Crotti L, van der Harst P, Munroe PB, Koopmann TT, Sotoodehnia N, Rossin EJ,  
907 Morley M, Wang X, Johnson AD, Lundby A, Gudbjartsson DF, Noseworthy PA, Eijgelsheim M,  
908 Bradford Y, Tarasov K V, Dörr M, Müller-Nurasyid M, et al. 2014. Genetic association study of QT  
909 interval highlights role for calcium signaling pathways in myocardial repolarization. *Nat Genet* **46**:  
910 826–836.

911 Arnolds DE, Liu F, Fahrenbach JP, Kim GH, Schillinger KJ, Smemo S, McNally EM, Nobrega MA, Patel

- 912 V V., Moskowitz IP. 2012. TBX5 drives Scn5a expression to regulate cardiac conduction system  
913 function. *J Clin Invest* **122**: 2509–2518.
- 914 Ashburner M, Ball CA, Blake JA, Botstein D, Butler H, Cherry JM, Davis AP, Dolinski K, Dwight SS,  
915 Eppig JT, Harris MA, Hill DP, Issel-Tarver L, Kasarskis A, Lewis S, Matese JC, Richardson JE,  
916 Ringwald M, Rubin GM, et al. 2000. Gene ontology: tool for the unification of biology. The Gene  
917 Ontology Consortium. *Nat Genet* **25**: 25–9.
- 918 Banovich NE, Li YI, Raj A, Ward MC, Greenside P, Calderon D, Tung PY, Burnett JE, Myrthil M,  
919 Thomas SM, Burrows CK, Romero IG, Pavlovic BJ, Kundaje A, Pritchard JK, Gilad Y. 2018.  
920 Impact of regulatory variation across human iPSCs and differentiated cells. *Genome Res* **28**: 122–  
921 131.
- 922 Blake JA, Eppig JT, Kadin JA, Richardson JE, Smith CL, Bult CJ, the Mouse Genome Database Group.  
923 2017. Mouse Genome Database (MGD)-2017: community knowledge resource for the laboratory  
924 mouse. *Nucleic Acids Res* **45**: D723–D729.
- 925 Burridge PW, Matsa E, Shukla P, Lin ZC, Churko JM, Ebert AD, Lan F, Diecke S, Huber B, Mordwinkin  
926 NM, Plews JR, Abilez OJ, Cui B, Gold JD, Wu JC. 2014. Chemically defined generation of human  
927 cardiomyocytes. *Nat Methods* **11**: 855–60.
- 928 Cai C-L, Zhou W, Yang L, Bu L, Qyang Y, Zhang X, Li X, Rosenfeld MG, Chen J, Evans S. 2005. T-box  
929 genes coordinate regional rates of proliferation and regional specification during cardiogenesis.  
930 *Development* **132**: 2475–2487.
- 931 Cairns J, Freire-Pritchett P, Wingett SW, Várnai C, Dimond A, Plagnol V, Zerbino D, Schoenfelder S,  
932 Javierre B-M, Osborne C, Fraser P, Spivakov M. 2016. CHiCAGO: robust detection of DNA  
933 looping interactions in Capture Hi-C data. *Genome Biol* **17**: 127.
- 934 Calo E, Wysocka J. 2013. Modification of enhancer chromatin: what, how, and why? *Mol Cell* **49**: 825–

- 935 37.
- 936 Carithers LJ, Ardlie K, Barcus M, Branton PA, Britton A, Buia SA, Compton CC, DeLuca DS, Peter-  
937 Demchok J, Gelfand ET, Guan P, Korzeniewski GE, Lockhart NC, Rabiner CA, Rao AK, Robinson  
938 KL, Roche N V., Sawyer SJ, Segrè A V., et al. 2015. A Novel Approach to High-Quality  
939 Postmortem Tissue Procurement: The GTEx Project. *Biopreserv Biobank* **13**: 311–319.
- 940 Claussnitzer M, Dankel SN, Kim K-H, Quon G, Meuleman W, Haugen C, Glunk V, Sousa IS, Beaudry  
941 JL, Puvion-Vandier V, Abdennur NA, Liu J, Svensson P-A, Hsu Y-H, Drucker DJ, Mellgren G, Hui C-C,  
942 Hauner H, Kellis M. 2015. *FTO* Obesity Variant Circuitry and Adipocyte Browning in Humans. *N*  
943 *Engl J Med* **373**: 895–907.
- 944 Cowper-Sal-lari R, Zhang X, Wright JB, Bailey SD, Cole MD, Eeckhoutte J, Moore JH, Lupien M. 2012.  
945 Breast cancer risk-associated SNPs modulate the affinity of chromatin for FOXA1 and alter gene  
946 expression. *Nat Genet* **44**: 1191–1198.
- 947 Creighton MP, Cheng AW, Welstead GG, Kooistra T, Carey BW, Steine EJ, Hanna J, Lodato MA,  
948 Frampton GM, Sharp PA, Boyer LA, Young RA, Jaenisch R. 2010. Histone H3K27ac separates  
949 active from poised enhancers and predicts developmental state. *Proc Natl Acad Sci* **107**: 21931–  
950 21936.
- 951 Dao LTM, Galindo-Albarrán AO, Castro-Mondragon JA, Andrieu-Soler C, Medina-Rivera A, Souaid C,  
952 Charbonnier G, Griffon A, Vanhille L, Stephen T, Alomairi J, Martin D, Torres M, Fernandez N,  
953 Soler E, van Helden J, Puthier D, Spicuglia S. 2017. Genome-wide characterization of mammalian  
954 promoters with distal enhancer functions. *Nat Genet* **49**: 1073–1081.
- 955 Dekker J, Mirny L. 2016. The 3D Genome as Moderator of Chromosomal Communication. *Cell* **164**:  
956 1110–1121.
- 957 Deng W, Lee J, Wang H, Miller J, Reik A, Gregory PD, Dean A, Blobel G a. 2012. Controlling long-

- 958 range genomic interactions at a native locus by targeted tethering of a looping factor. *Cell* **149**:  
959 1233–1244.
- 960 Diao Y, Fang R, Li B, Meng Z, Yu J, Qiu Y, Lin KC, Huang H, Liu T, Marina RJ, Jung I, Shen Y, Guan  
961 K-L, Ren B. 2017. A tiling-deletion-based genetic screen for cis-regulatory element identification in  
962 mammalian cells. *Nat Methods* **14**: 629–635.
- 963 Dixon JR, Jung I, Selvaraj S, Shen Y, Antosiewicz-Bourget JE, Lee AY, Ye Z, Kim A, Rajagopal N, Xie  
964 W, Diao Y, Liang J, Zhao H, Lobanenkov V V, Ecker JR, Thomson JA, Ren B. 2015. Chromatin  
965 architecture reorganization during stem cell differentiation. *Nature* **518**.
- 966 Dixon JR, Selvaraj S, Yue F, Kim A, Li Y, Shen Y, Hu M, Liu JS, Ren B. 2012. Topological domains in  
967 mammalian genomes identified by analysis of chromatin interactions. *Nature* **485**: 376–380.
- 968 ENCODE Project Consortium TEP. 2012. An integrated encyclopedia of DNA elements in the human  
969 genome. *Nature* **489**: 57–74.
- 970 Erceg J, Pakozdi T, Marco-Ferreres R, Ghavi-Helm Y, Girardot C, Bracken AP, Furlong EEM. 2017.  
971 Dual functionality of cis-regulatory elements as developmental enhancers and Polycomb response  
972 elements. *Genes Dev* **31**: 590–602.
- 973 Franke M, Ibrahim DM, Andrey G, Schwarzer W, Heinrich V, Schöpflin R, Kraft K, Kempfer R, Jerković  
974 I, Chan W-L, Spielmann M, Timmermann B, Wittler L, Kurth I, Cambiaso P, Zuffardi O, Houge G,  
975 Lambie L, Brancati F, et al. 2016. Formation of new chromatin domains determines pathogenicity  
976 of genomic duplications. *Nature*.
- 977 Freire-Pritchett P, Schoenfelder S, Várnai C, Wingett SW, Cairns J, Collier AJ, García-Vílchez R,  
978 Furlan-Magaril M, Osborne CS, Fraser PJ, Rugg-Gunn PJ, Spivakov M. 2017. Global  
979 reorganisation of *cis*-regulatory units upon lineage commitment of human embryonic stem cells.  
980 *Elife* **6**: e21926.

- 981 Ghavi-Helm Y, Klein FA, Pakozdi T, Ciglar L, Noordermeer D, Huber W, Furlong EEM. 2014. Enhancer  
982 loops appear stable during development and are associated with paused polymerase. *Nature* **512**:  
983 96.
- 984 Gherghiceanu M, Barad L, Novak A, Reiter I, Itskovitz-Eldor J, Binah O, Popescu LM. 2011.  
985 Cardiomyocytes derived from human embryonic and induced pluripotent stem cells: comparative  
986 ultrastructure. *J Cell Mol Med* **15**: 2539–2551.
- 987 Gilbert N, Boyle S, Fiegler H, Woodfine K, Carter NP, Bickmore WA. 2004. Chromatin Architecture of  
988 the Human Genome: Gene-Rich Domains Are Enriched in Open Chromatin Fibers. *Cell* **118**: 555–  
989 566.
- 990 Gnirke A, Melnikov A, Maguire J, Rogov P, LeProust EM, Brockman W, Fennell T, Giannoukos G,  
991 Fisher S, Russ C, Gabriel S, Jaffe DB, Lander ES, Nusbaum C. 2009. Solution hybrid selection  
992 with ultra-long oligonucleotides for massively parallel targeted sequencing. *Nat Biotechnol* **27**:  
993 182–9.
- 994 Guo D-C, Papke CL, Tran-Fadulu V, Regalado ES, Avidan N, Johnson RJ, Kim DH, Pannu H, Willing  
995 MC, Sparks E, Pyeritz RE, Singh MN, Dalman RL, Grotta JC, Marian AJ, Boerwinkle EA, Frazier  
996 LQ, LeMaire SA, Coselli JS, et al. 2009. Mutations in smooth muscle alpha-actin (ACTA2) cause  
997 coronary artery disease, stroke, and Moyamoya disease, along with thoracic aortic disease. *Am J*  
998 *Hum Genet* **84**: 617–27.
- 999 Heintzman ND, Hon GC, Hawkins RD, Kheradpour P, Stark A, Harp LF, Ye Z, Lee LK, Stuart RK,  
1000 Ching CW, Ching KA, Antosiewicz-Bourget JE, Liu H, Zhang X, Green RD, Lobanenkov V V,  
1001 Stewart R, Thomson JA, Crawford GE, et al. 2009. Histone modifications at human enhancers  
1002 reflect global cell-type-specific gene expression. *Nature* **459**: 108–12.
- 1003 Heinz S, Benner C, Spann N, Bertolino E, Lin YC, Laslo P, Cheng JX, Murre C, Singh H, Glass CK.  
1004 2010. Simple Combinations of Lineage-Determining Transcription Factors Prime cis-Regulatory

- 1005 Elements Required for Macrophage and B Cell Identities. *Mol Cell* **38**: 576–589.
- 1006 Hnisz D, Shrinivas K, Young RA, Chakraborty AK, Sharp PA. 2017. Perspective A Phase Separation  
1007 Model for Transcriptional Control. *Cell* **169**: 13–23.
- 1008 Javierre BM, Sewitz S, Cairns J, Wingett SW, Várnai C, Thiecke MJ, Freire-Pritchett P, Spivakov M,  
1009 Fraser P, Burren OS, Cutler AJ, Todd JA, Wallace C, Wilder SP, Kreuzhuber R, Kostadima M,  
1010 Zerbino DR, Stegle O, Kreuzhuber R, et al. 2016. Lineage-Specific Genome Architecture Links  
1011 Enhancers and Non-coding Disease Variants to Target Gene Promoters. *Cell* **167**: 1369–  
1012 1384.e19.
- 1013 Jin F, Li Y, Dixon JR, Selvaraj S, Ye Z, Lee AY, Yen C-A, Schmitt AD, Espinoza C a, Ren B. 2013. A  
1014 high-resolution map of the three-dimensional chromatin interactome in human cells. *Nature* **503**:  
1015 290–4.
- 1016 Karakikes I, Ameen M, Termglinchan V, Wu JC. 2015. Human Induced Pluripotent Stem Cell–Derived  
1017 Cardiomyocytes. *Circ Res* **117**.
- 1018 Karlič R, Chung H-R, Lasserre J, Vlahovicek K, Vingron M. 2010. Histone modification levels are  
1019 predictive for gene expression. *Proc Natl Acad Sci U S A* **107**: 2926–31.
- 1020 Langmead B, Salzberg SL. 2012. Fast gapped-read alignment with Bowtie 2. *Nat Methods* **9**: 357–359.
- 1021 Li H. 2011. Tabix: fast retrieval of sequence features from generic TAB-delimited files. *Bioinformatics*  
1022 **27**: 718–9.
- 1023 Lieberman-Aiden E, van Berkum NL, Williams L, Imakaev M, Ragoczy T, Telling A, Amit I, Lajoie BR,  
1024 Sabo PJ, Dorschner MO, Sandstrom R, Bernstein B, Bender MA, Groudine M, Gnirke A,  
1025 Stamatoyannopoulos J, Mirny LA, Lander ES, Dekker J. 2009. Comprehensive mapping of long-  
1026 range interactions reveals folding principles of the human genome. *Science* **326**: 289–93.
- 1027 Love MI, Huber W, Anders S. 2014. Moderated estimation of fold change and dispersion for RNA-seq



- 1028 data with DESeq2. *Genome Biol* **15**: 550.
- 1029 Lupiáñez DG, Kraft K, Heinrich V, Krawitz P, Brancati F, Klopocki E, Horn D, Kayserili H, Opitz JM,  
1030 Laxova R, Santos-Simarro F, Gilbert-Dussardier B, Wittler L, Borschiwer M, Haas SA, Osterwalder  
1031 M, Franke M, Timmermann B, Hecht J, et al. 2015. Disruptions of Topological Chromatin Domains  
1032 Cause Pathogenic Rewiring of Gene-Enhancer Interactions. *Cell* **161**: 1012–1025.
- 1033 Mahmoud AI, Kocabas F, Muralidhar SA, Kimura W, Koura AS, Thet S, Porrello ER, Sadek HA. 2013.  
1034 Meis1 regulates postnatal cardiomyocyte cell cycle arrest. *Nature* **497**: 249–253.
- 1035 Maurano MT, Humbert R, Rynes E, Thurman RE, Haugen E, Wang H, Reynolds AP, Sandstrom R, Qu  
1036 H, Brody J, Shafer A, Neri F, Lee K, Kutayavin T, Stehling-Sun S, Johnson AK, Canfield TK, Giste  
1037 E, Diegel M, et al. 2012. Systematic Localization of Common Disease-Associate Variation in  
1038 Regulatory DNA. *Science (80- )* **337**: 1190–1195.
- 1039 Meder B, Rühle F, Weis T, Homuth G, Keller A, Franke J, Peil B, Lorenzo Bermejo J, Frese K, Hüge A,  
1040 Witten A, Vogel B, Haas J, Völker U, Ernst F, Teumer A, Ehlermann P, Zugck C, Friedrichs F, et  
1041 al. 2014. A genome-wide association study identifies 6p21 as novel risk locus for dilated  
1042 cardiomyopathy. *Eur Heart J* **35**: 1069–1077.
- 1043 Miele A, Dekker J. 2008. Long-range chromosomal interactions and gene regulation. *Mol Biosyst* **4**:  
1044 1046.
- 1045 Mifsud B, Tavares-Cadete F, Young AN, Sugar R, Schoenfelder S, Ferreira L, Wingett SW, Andrews S,  
1046 Grey W, Ewels P a, Herman B, Happe S, Higgs A, LeProust E, Follows G a, Fraser P, Luscombe  
1047 NM, Osborne CS. 2015. Mapping long-range promoter contacts in human cells with high-  
1048 resolution capture Hi-C. *Nat Genet* **47**: 598–606.
- 1049 Moshal K, Roder K, Werdich AA, Dural NT, Kim TY, Cooper LL, Lu YC, Choi B-R, Terentyev D,  
1050 MacRae C, Koren G. 2017. LITAF, A Novel Regulator of Cardiac Excitation. *FASEB J* **31**: 686.3-

- 1051 686.3.
- 1052 Mumbach MR, Satpathy AT, Boyle EA, Dai C, Gowen BG, Cho SW, Nguyen ML, Rubin AJ, Granja JM,  
1053 Kazane KR, Wei Y, Nguyen T, Greenside PG, Corces MR, Tycko J, Simeonov DR, Suliman N, Li  
1054 R, Xu J, et al. 2017. Enhancer connectome in primary human cells identifies target genes of  
1055 disease-associated DNA elements. *Nat Genet* **49**: 1602–1612.
- 1056 Musunuru K, Strong A, Frank-Kamenetsky M, Lee NE, Ahfeldt T, Sachs K V, Li X, Li H, Kuperwasser  
1057 N, Ruda VM, Pirruccello JP, Muchmore B, Prokunina-Olsson L, Hall JL, Schadt EE, Morales CR,  
1058 Lund-Katz S, Phillips MC, Wong J, et al. 2010. From noncoding variant to phenotype via SORT1 at  
1059 the 1p13 cholesterol locus. *Nature* **466**: 714–9.
- 1060 Nikpay M, Goel A, Won H-H, Hall LM, Willenborg C, Kanoni S, Saleheen D, Kyriakou T, Nelson CP,  
1061 Hopewell JC, Webb TR, Zeng L, Dehghan A, Alver M, Armasu SM, Auro K, Bjornnes A, Chasman  
1062 DI, Chen S, et al. 2015. A comprehensive 1000 Genomes–based genome-wide association meta-  
1063 analysis of coronary artery disease. *Nat Genet* **47**: 1121–1130.
- 1064 Nora EP, Goloborodko A, Valton AL, Gibcus JH, Uebersohn A, Abdennur N, Dekker J, Mirny LA,  
1065 Bruneau BG. 2017. Targeted Degradation of CTCF Decouples Local Insulation of Chromosome  
1066 Domains from Genomic Compartmentalization. *Cell* **169**: 930–944.e22.
- 1067 Nora EP, Lajoie BR, Schulz EG, Giorgetti L, Okamoto I, Servant N, Piolot T, van Berkum NL, Meisig J,  
1068 Sedat J, Gribnau J, Barillot E, Blüthgen N, Dekker J, Heard E. 2012. Spatial partitioning of the  
1069 regulatory landscape of the X-inactivation centre. *Nature* **485**: 381–385.
- 1070 O’Leary NA, Wright MW, Brister JR, Ciufu S, Haddad D, McVeigh R, Rajput B, Robbertse B, Smith-  
1071 White B, Ako-Adjei D, Astashyn A, Badretdin A, Bao Y, Blinkova O, Brover V, Chetvernin V, Choi  
1072 J, Cox E, Ermolaeva O, et al. 2016. Reference sequence (RefSeq) database at NCBI: current  
1073 status, taxonomic expansion, and functional annotation. *Nucleic Acids Res* **44**: D733-45.

- 1074 Patro R, Duggal G, Love MI, Irizarry RA, Kingsford C. 2017. Salmon provides fast and bias-aware  
1075 quantification of transcript expression. *Nat Methods* **14**: 417–419.
- 1076 Pennacchio LA, Bickmore W, Dean A, Nobrega MA, Bejerano G. 2013. Enhancers: five essential  
1077 questions. *Nat Rev Genet* **14**: 288–295.
- 1078 Petersen CM, Nielsen MS, Nykjaer A, Jacobsen L, Tommerup N, Rasmussen HH, Roigaard H,  
1079 Gliemann J, Madsen P, Moestrup SK. 1997. Molecular identification of a novel candidate sorting  
1080 receptor purified from human brain by receptor-associated protein affinity chromatography. *J Biol*  
1081 *Chem* **272**: 3599–605.
- 1082 Phanstiel DH, Van Bortle K, Spacek D, Hess GT, Shamim MS, Machol I, Love MI, Aiden EL, Bassik  
1083 MC, Snyder MP. 2017. Static and Dynamic DNA Loops form AP-1-Bound Activation Hubs during  
1084 Macrophage Development. *Mol Cell* **67**: 1037–1048.e6.
- 1085 Phillips-Cremins JE, Sauria MEG, Sanyal A, Gerasimova TI, Lajoie BR, Bell JSK, Ong C-T, Hookway  
1086 TA, Guo C, Sun Y, Bland MJ, Wagstaff W, Dalton S, McDevitt TC, Sen R, Dekker J, Taylor J,  
1087 Corces VG. 2013. Architectural Protein Subclasses Shape 3D Organization of Genomes during  
1088 Lineage Commitment. *Cell* **153**: 1281–1295.
- 1089 Phillips JE, Corces VG. 2009. CTCF: master weaver of the genome. *Cell* **137**: 1194–211.
- 1090 Pikkarainen S, Tokola H, Kerkelä R, Ruskoaho H. 2004. GATA transcription factors in the developing  
1091 and adult heart. *Cardiovasc Res* **63**: 196–207.
- 1092 Purcell S, Neale B, Todd-Brown K, Thomas L, Ferreira MAR, Bender D, Maller J, Sklar P, de Bakker  
1093 PIW, Daly MJ, Sham PC. 2007. PLINK: a tool set for whole-genome association and population-  
1094 based linkage analyses. *Am J Hum Genet* **81**: 559–75.
- 1095 Quinlan AR, Hall IM. 2010. BEDTools: a flexible suite of utilities for comparing genomic features.  
1096 *Bioinformatics* **26**: 841–2.

- 1097 Rada-Iglesias A, Bajpai R, Swigut T, Brugmann SA, Flynn RA, Wysocka J. 2011. A unique chromatin  
1098 signature uncovers early developmental enhancers in humans. *Nature* **470**: 279–283.
- 1099 Rao SSP, Huntley MH, Durand NC, Stamenova EK, Bochkov ID, Robinson JT, Sanborn AL, Machol I,  
1100 Omer AD, Lander ES, Aiden EL. 2014. A 3D Map of the Human Genome at Kilobase Resolution  
1101 Reveals Principles of Chromatin Looping. *Cell* **159**: 1665–1680.
- 1102 Roadmap Epigenomics Consortium A, Kundaje A, Meuleman W, Ernst J, Bilenky M, Yen A, Heravi-  
1103 Moussavi A, Kheradpour P, Zhang Z, Wang J, Ziller MJ, Amin V, Whitaker JW, Schultz MD, Ward  
1104 LD, Sarkar A, Quon G, Sandstrom RS, Eaton ML, et al. 2015. Integrative analysis of 111 reference  
1105 human epigenomes. *Nature* **518**: 317–30.
- 1106 Rubin AJ, Barajas BC, Furlan-Magaril M, Lopez-Pajares V, Mumbach MR, Howard I, Kim DS, Boxer  
1107 LD, Cairns J, Spivakov M, Wingett SW, Shi M, Zhao Z, Greenleaf WJ, Kundaje A, Snyder M,  
1108 Chang HY, Fraser P, Khavari PA. 2017. Lineage-specific dynamic and pre-established enhancer–  
1109 promoter contacts cooperate in terminal differentiation. *Nat Genet*.
- 1110 Sakabe NJ, Aneas I, Shen T, Shokri L, Park S-Y, Bulyk ML, Evans SM, Nobrega MA. 2012. Dual  
1111 transcriptional activator and repressor roles of TBX20 regulate adult cardiac structure and function.  
1112 *Hum Mol Genet* **21**: 2194–2204.
- 1113 Schmitt AD, Hu M, Jung I, Xu Z, Qiu Y, Tan CL, Li Y, Lin S, Lin Y, Barr CL, Ren B. 2016. A  
1114 Compendium of Chromatin Contact Maps Reveals Spatially Active Regions in the Human  
1115 Genome. *Cell Rep* **17**: 2042–2059.
- 1116 Schoenfelder S, Furlan-Magaril M, Mifsud B, Tavares-Cadete F, Sugar R, Javierre B-M, Nagano T,  
1117 Katsman Y, Sakthidevi M, Wingett SW, Dimitrova E, Dimond A, Edelman LB, Elderkin S, Tabbada  
1118 K, Darbo E, Andrews S, Herman B, Higgs A, et al. 2015. The pluripotent regulatory circuitry  
1119 connecting promoters to their long-range interacting elements. *Genome Res* **25**: 582–597.

- 1120 Shen T, Aneas I, Sakabe N, Dirschinger RJ, Wang G, Smemo S, Westlund JM, Cheng H, Dalton N, Gu  
1121 Y, Boogerd CJ, Cai C, Peterson K, Chen J, Nobrega MA, Evans SM. 2011. Tbx20 regulates a  
1122 genetic program essential to adult mouse cardiomyocyte function. *J Clin Invest* **121**: 4640–54.
- 1123 Shin H, Shi Y, Dai C, Tjong H, Gong K, Alber F, Zhou XJ. 2016. TopDom: an efficient and deterministic  
1124 method for identifying topological domains in genomes. *Nucleic Acids Res* **44**: e70.
- 1125 Siersbæk R, Madsen JGS, Javierre BM, Nielsen R, Bagge EK, Cairns J, Wingett SW, Traynor S,  
1126 Spivakov M, Fraser P, Mandrup S. 2017. Dynamic Rewiring of Promoter-Anchored Chromatin  
1127 Loops during Adipocyte Differentiation. *Mol Cell* **66**: 420–435.e5.
- 1128 Smemo S, Campos LC, Moskowitz IP, Krieger JE, Pereira AC, Nobrega MA. 2012. Regulatory variation  
1129 in a TBX5 enhancer leads to isolated congenital heart disease. *Hum Mol Genet* **21**: 3255–63.
- 1130 Smemo S, Tena JJ, Kim K-H, Gamazon ER, Sakabe NJ, Gómez-Marín C, Aneas I, Credidio FL,  
1131 Sobreira DR, Wasserman NF, Lee JH, Puvindran V, Tam D, Shen M, Son JE, Vakili NA, Sung H-  
1132 K, Naranjo S, Acemel RD, et al. 2014. Obesity-associated variants within FTO form long-range  
1133 functional connections with IRX3. *Nature* **507**: 371–5.
- 1134 Smith NL, Felix JF, Morrison AC, Demissie S, Glazer NL, Loehr LR, Cupples LA, Dehghan A, Lumley  
1135 T, Rosamond WD, Lieb W, Rivadeneira F, Bis JC, Folsom AR, Benjamin E, Aulchenko YS,  
1136 Haritunians T, Couper D, Murabito J, et al. 2010. Association of Genome-Wide Variation With the  
1137 Risk of Incident Heart Failure in Adults of European and African Ancestry: A Prospective Meta-  
1138 Analysis From the Cohorts for Heart and Aging Research in Genomic Epidemiology (CHARGE)  
1139 Consortium. *Circ Cardiovasc Genet* **3**: 256–266.
- 1140 Sonesson C, Love MI, Robinson MD. 2015. Differential analyses for RNA-seq: transcript-level estimates  
1141 improve gene-level inferences. *F1000Research* **4**: 1521.
- 1142 Speir ML, Zweig AS, Rosenbloom KR, Raney BJ, Paten B, Nejad P, Lee BT, Learned K, Karolchik D,

- 1143 Hinrichs AS, Heitner S, Harte RA, Haeussler M, Guruvadoo L, Fujita PA, Eisenhart C, Diekhans M,  
1144 Clawson H, Casper J, et al. 2016. The UCSC Genome Browser database: 2016 update. *Nucleic*  
1145 *Acids Res* **44**: D717–D725.
- 1146 Spitz F, Furlong EEM. 2012. Transcription factors: from enhancer binding to developmental control. *Nat*  
1147 *Rev Genet* **13**: 613–626.
- 1148 Stevens TJ, Lando D, Basu S, Atkinson LP, Cao Y, Lee SF, Leeb M, Wohlfahrt KJ, Boucher W,  
1149 O’Shaughnessy-Kirwan A, Cramard J, Faure AJ, Ralser M, Blanco E, Morey L, Sansó M, Palayret  
1150 MGS, Lehner B, Di Croce L, et al. 2017. 3D structures of individual mammalian genomes studied  
1151 by single-cell Hi-C. *Nature* **544**: 59–64.
- 1152 Storey JD, Tibshirani R. 2003. Statistical significance for genomewide studies. *Proc Natl Acad Sci U S*  
1153 *A* **100**: 9440–5.
- 1154 Symmons O, Pan L, Remeseiro S, Aktas T, Klein F, Huber W, Spitz F. 2016. The Shh Topological  
1155 Domain Facilitates the Action of Remote Enhancers by Reducing the Effects of Genomic  
1156 Distances. *Dev Cell* **39**: 529–543.
- 1157 Tsujimura T, Klein FA, Langenfeld K, Glaser J, Huber W, Spitz F. 2015. A Discrete Transition Zone  
1158 Organizes the Topological and Regulatory Autonomy of the Adjacent Tfp2c and Bmp7 Genes ed.  
1159 W.A. Bickmore. *PLoS Genet* **11**: e1004897.
- 1160 Visel A, Minovitsky S, Dubchak I, Pennacchio LA. 2007. VISTA Enhancer Browser--a database of  
1161 tissue-specific human enhancers. *Nucleic Acids Res* **35**: D88-92.
- 1162 Watt AJ, Battle MA, Li J, Duncan SA. 2004. GATA4 is essential for formation of the proepicardium and  
1163 regulates cardiogenesis. *Proc Natl Acad Sci* **101**: 12573–12578.
- 1164 Wingett S, Ewels P, Furlan-Magaril M, Nagano T, Schoenfelder S, Fraser P, Andrews S. 2015. HiCUP:  
1165 pipeline for mapping and processing Hi-C data. *F1000Research* **4**: 1310.

1166 Wright JB, Brown SJ, Cole MD. 2010. Upregulation of c-MYC in cis through a Large Chromatin Loop

1167       Linked to a Cancer Risk-Associated Single-Nucleotide Polymorphism in Colorectal Cancer Cells.

1168       *Mol Cell Biol* **30**: 1411–1420.

Figure 1 - Figure Supplement 1

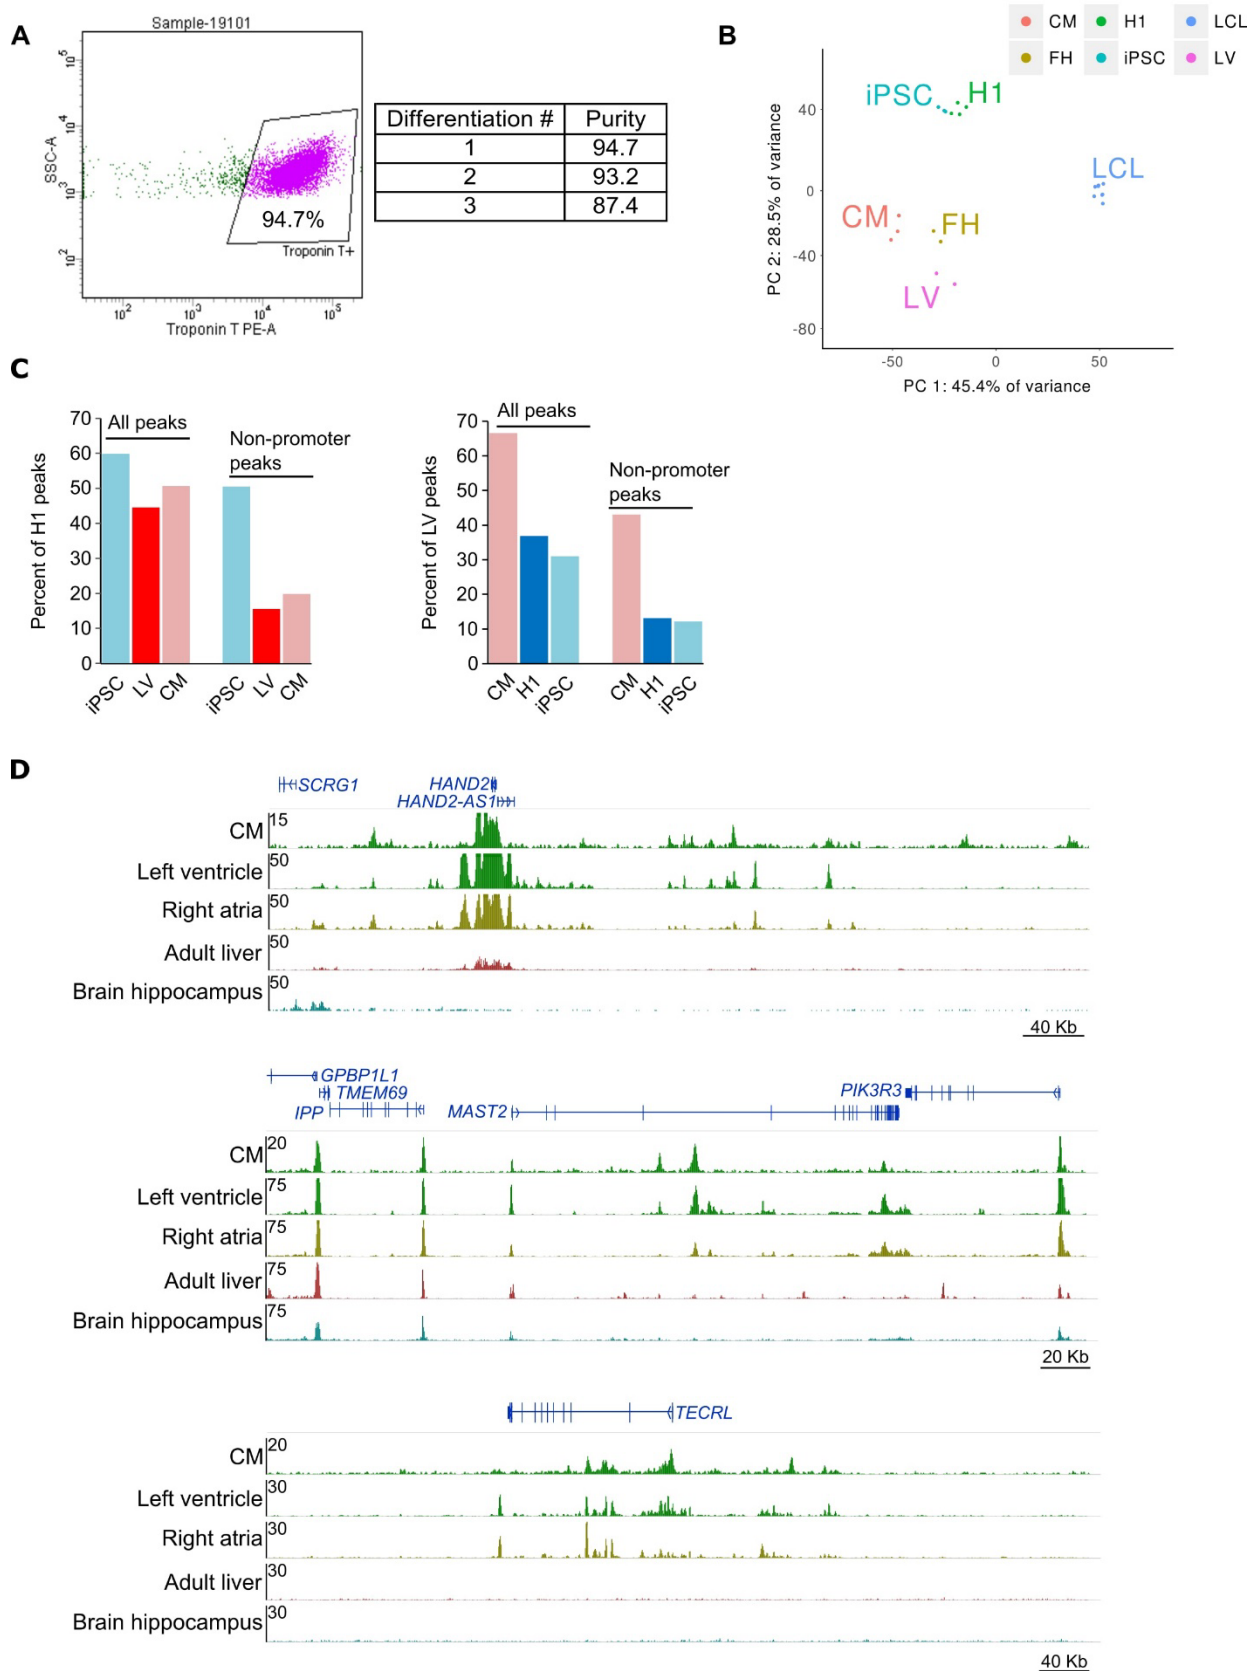



1170 **Figure 1—figure supplement 1. (A)** Flow cytometry of iPSC-derived cardiomyocytes. Representative  
1171 image of flow data for cardiomyocytes (left) and percent cardiac troponin T (cTnT) positive for each  
1172 differentiation (right). Cells were first gated on live/dead and then on cTnT staining. **(B)** Principle  
1173 component analysis of RNA-seq data in iPSCs and CMs along with H1 embryonic stem cells, left  
1174 ventricular cells (LV), fetal heart cells (FH), and lymphoblastoid cell line cells (LCL). LCLs cluster  
1175 independently from iPSC and CM, indicating that iPSCs were faithfully reprogrammed. **(C)** Percentage  
1176 of Epigenome Roadmap H3K27ac ChIP-seq peaks overlapping iPSC and CM H3K27ac peaks.  
1177 Overlaps for all peaks and only non-promoter peaks are shown. LV, left ventricle; H1, H1 embryonic  
1178 stem cell line. **(D)** Three genome browser snap-shots displaying the epigenetic landscape in CMs  
1179 compared to left ventricle, right atria, adult liver and brain hippocampus from the Epigenome Roadmap.

Figure 1 - Figure Supplement 2

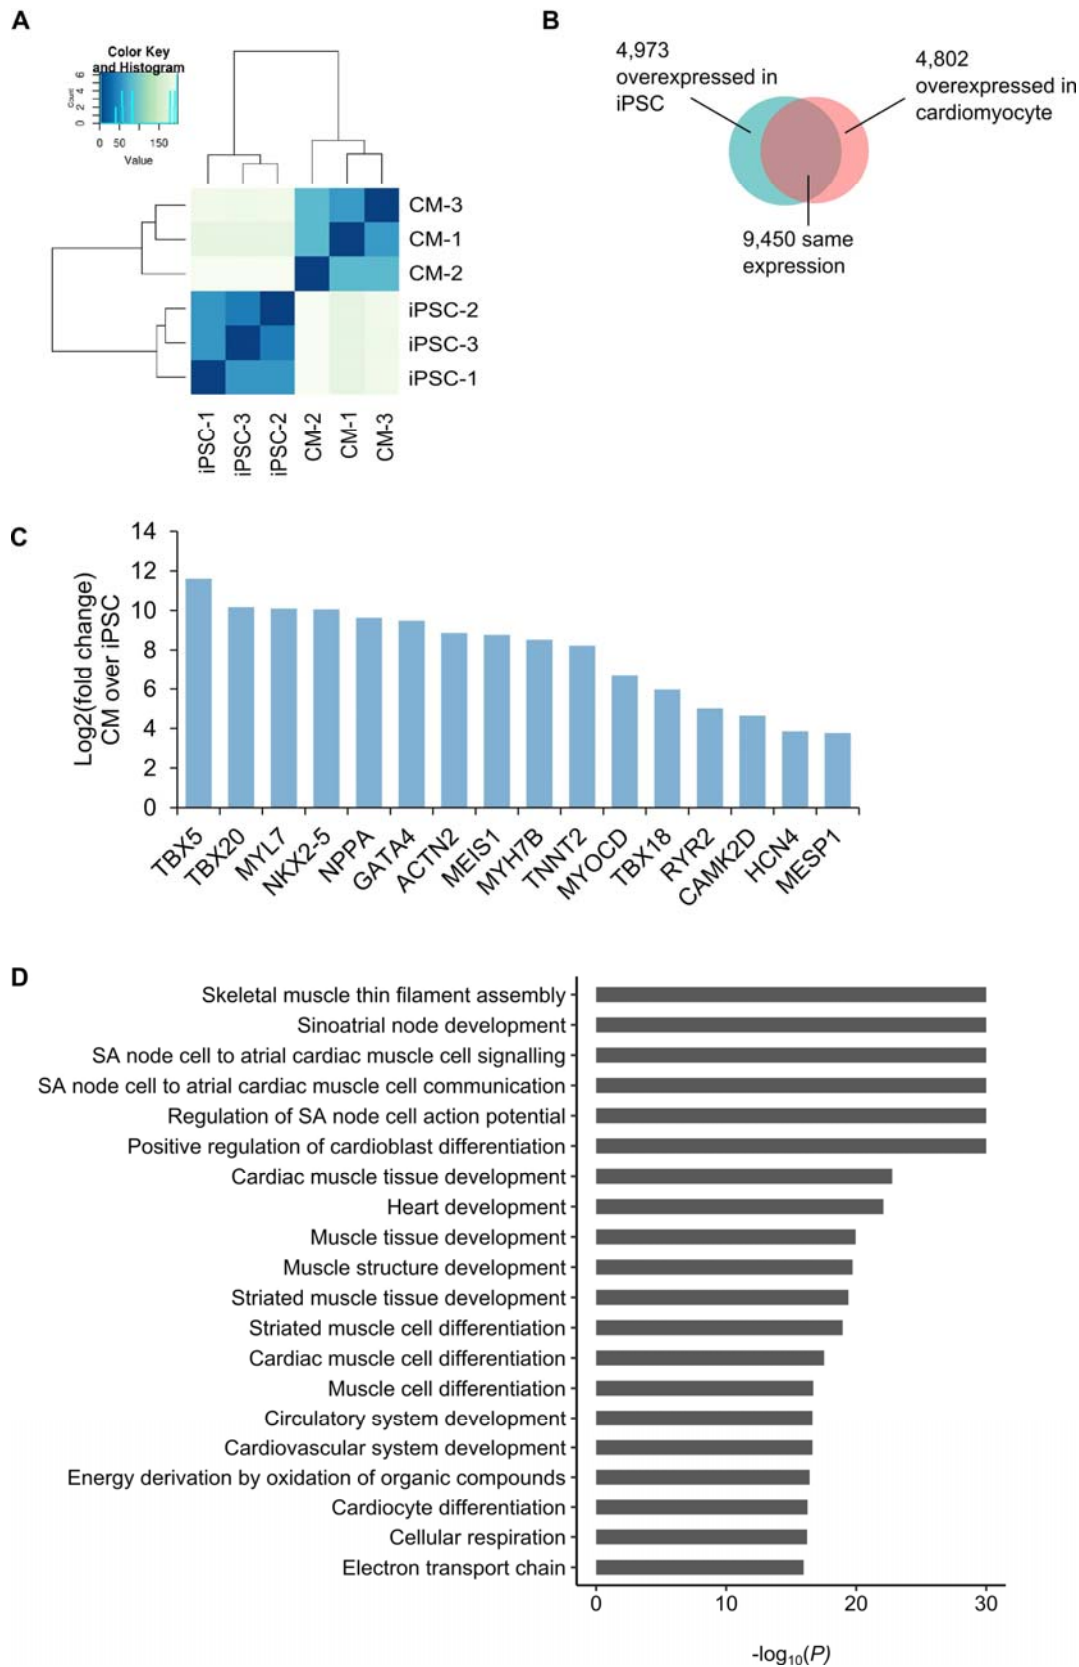

1181 **Figure 1—figure supplement 2. (A)** Cluster analysis of RNA-seq data from each triplicate of iPSC and  
1182 CM. **(B)** Number of genes differentially expressed in each cell type. **(C)** Selected genes overexpressed  
1183 in CMs relative to iPSCs. **(D)** Gene Ontology enrichment analysis of the biological processes  
1184 associated with the 4,802 genes overexpressed in cardiomyocytes.

Figure 1 - Figure Supplement 3

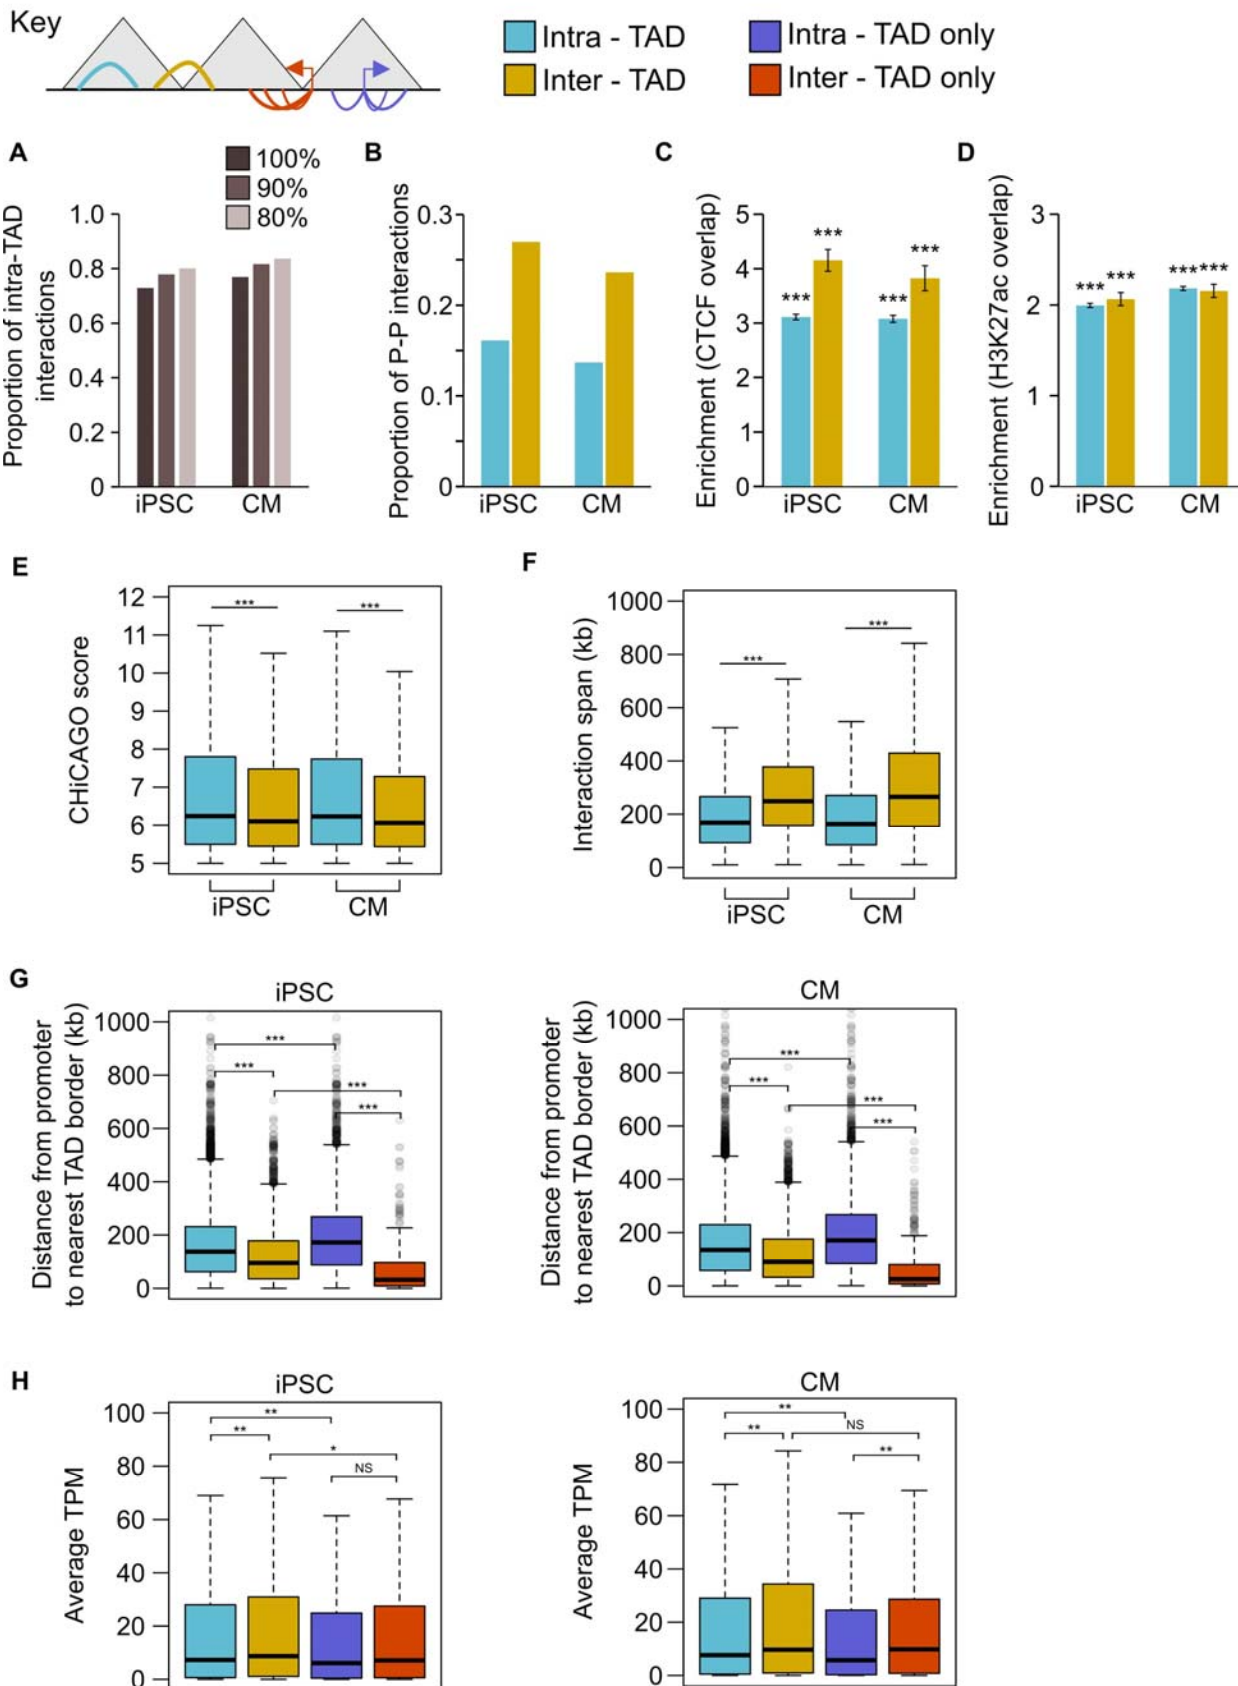

1186 **Figure 1—figure supplement 3.** In this analysis, interactions were classified as intra-TAD (both ends  
1187 of the interaction fully within a single TAD) or inter-TAD (each end of the interaction is in a different  
1188 TAD). Interactions falling partially or wholly within TAD “boundaries” or “gaps” as defined by TopDom  
1189 were omitted (see Methods). **(A)** Proportion of interactions that are intra-TAD at different cut-offs. All  
1190 analyses used interactions that were 100% within a TAD. **(B)** Proportion of promoter-promoter  
1191 interactions in the set of intra-TAD and inter-TAD interactions. **(C,D)** Fold enrichment for intra-TAD and  
1192 inter-TAD interactions to overlap CTCF **(C)** or H3K27ac peaks **(D)**. Only promoter-distal ChIP-seq  
1193 peaks were analyzed.  $***P < 2.2 \times 10^{-16}$ , Z-test. **(E)** CHiCAGO score and **(F)** interaction span of intra- vs.  
1194 inter-TAD interactions.  $***P < 2.2 \times 10^{-16}$ , Wilcoxon rank-sum test. **(G,H)** Considering promoters with an  
1195 intra-TAD interaction, an inter-TAD interaction, or exclusively intra-TAD or inter-TAD interactions: **(G)**  
1196 distance from the promoter TSS to the nearest TAD boundary and **(H)** average TPM value of the  
1197 promoter.  $***P < 2.2 \times 10^{-16}$ ,  $**P < 0.01$ ,  $*P < 0.05$ , NS = not significant, Wilcoxon rank-sum test.

Figure 3 - Figure Supplement 1

**A**

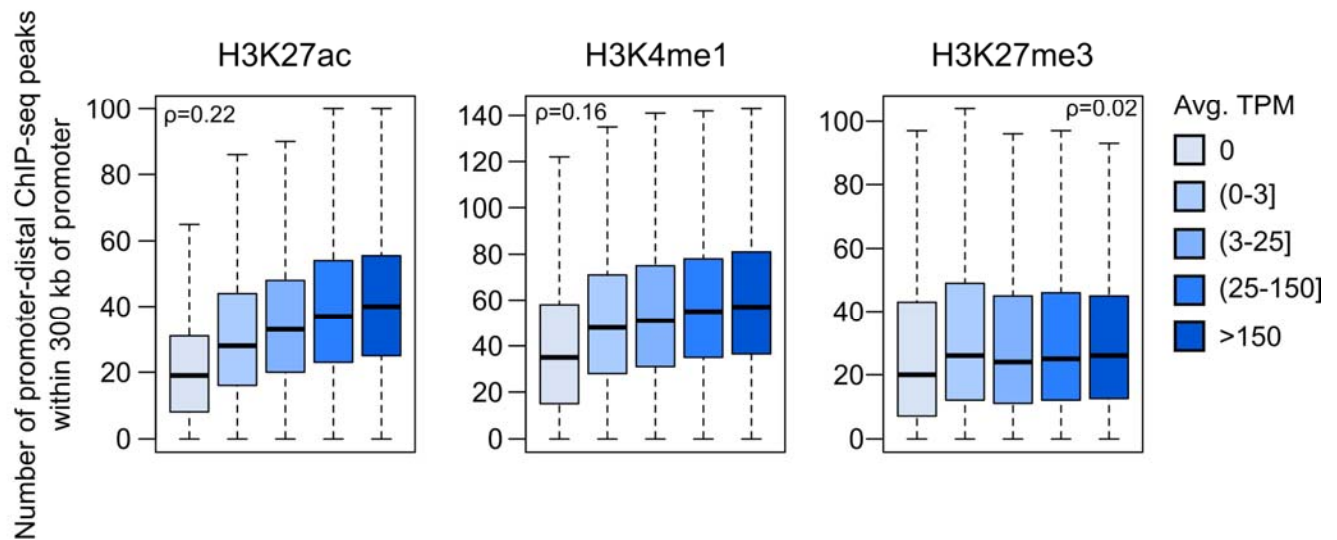

**B**

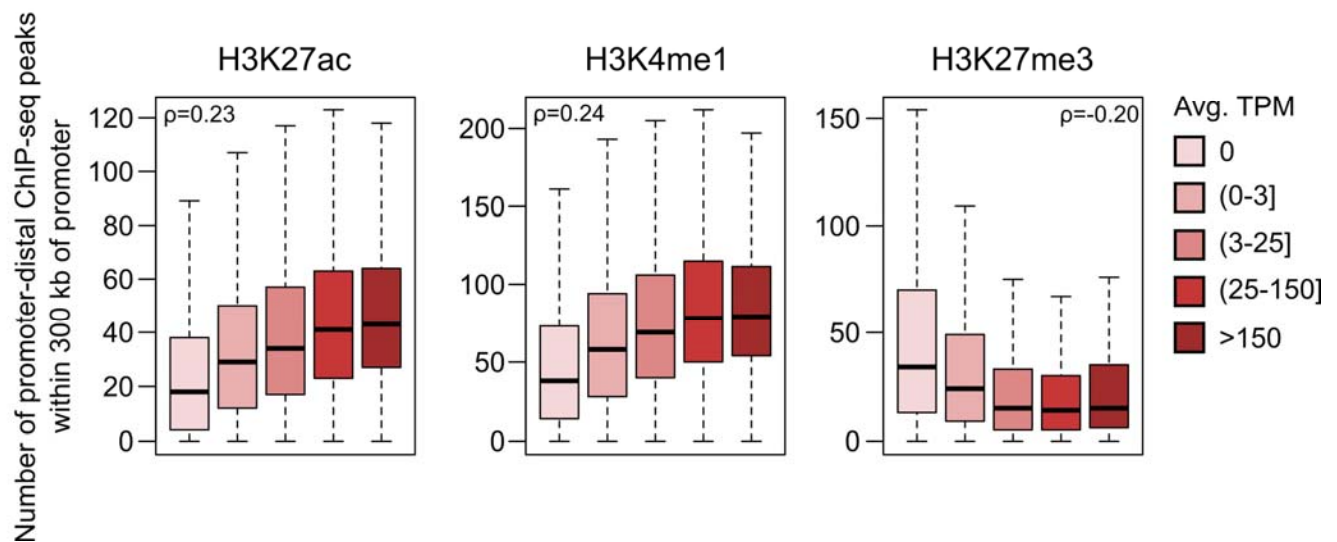

1198

1199 **Figure 3—figure supplement 1.** Number of promoter-distal histone ChIP-seq peaks within 300 kb of  
 1200 promoters in iPSC **(A)** and CM **(B)**. Spearman's rho ( $\rho$ ) was calculated on the full set of promoter  
 1201 expression values/peak counts for all promoters with at least one significant interaction in the  
 1202 respective cell type (12,926 genes for iPSC and 13,555 genes for CM; see Methods). Data are grouped  
 1203 by expression category to emphasize the trend. Horizontal bars indicate the median for each

1204 expression category. All correlation estimates are significant at  $P < 2.2 \times 10^{-16}$  except for H3K27me3 in  
1205 iPSCs ( $P = 0.06$ ).

Figure 4 - Figure Supplement 1

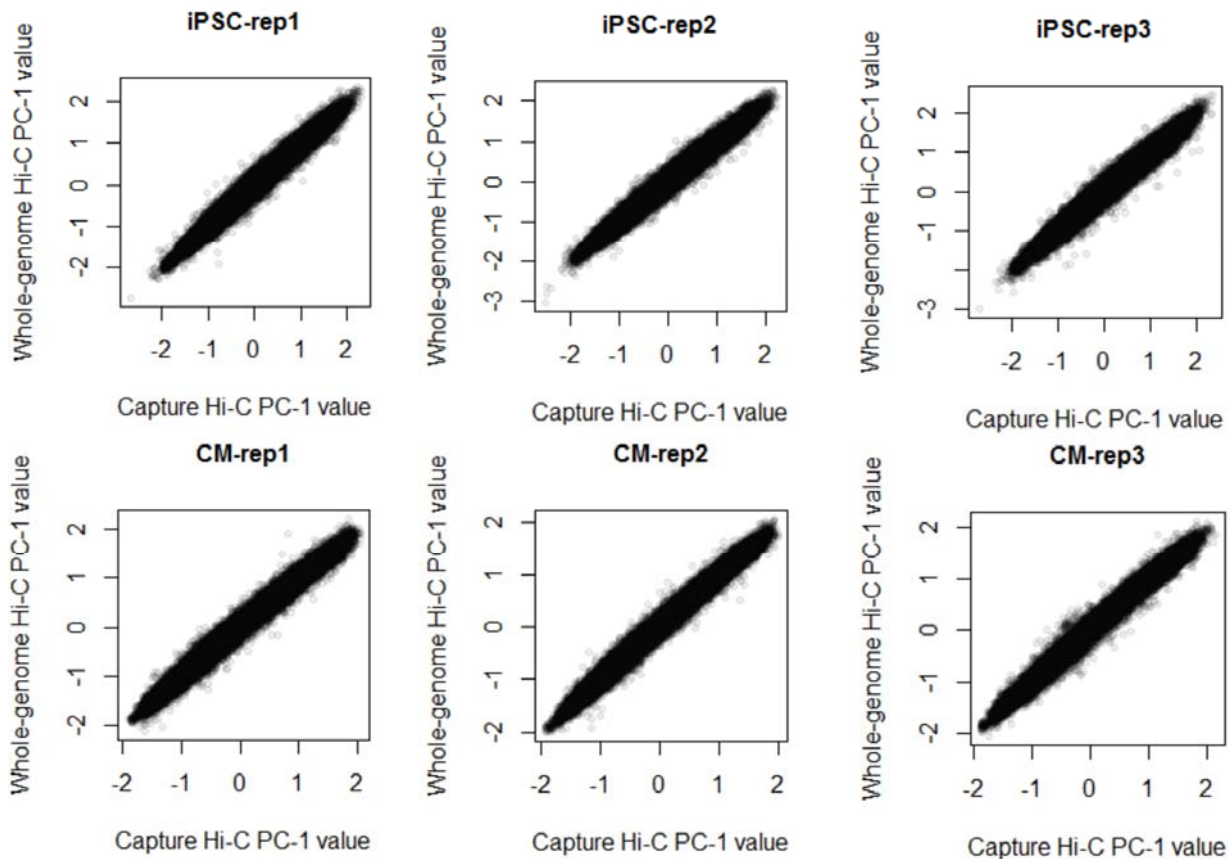

1206

1207 **Figure 4—figure supplement 1.** Correlation between the A/B compartment score (principle  
1208 component analysis of interaction data, PC-1) in whole-genome Hi-C (y-axis) and promoter capture Hi-  
1209 C (x-axis) in iPSCs (top) and CMs (bottom). Spearman's  $\rho > 0.98$ ,  $P < 2.2 \times 10^{-16}$  in all cases.

## Figure 4 - Figure Supplement 2

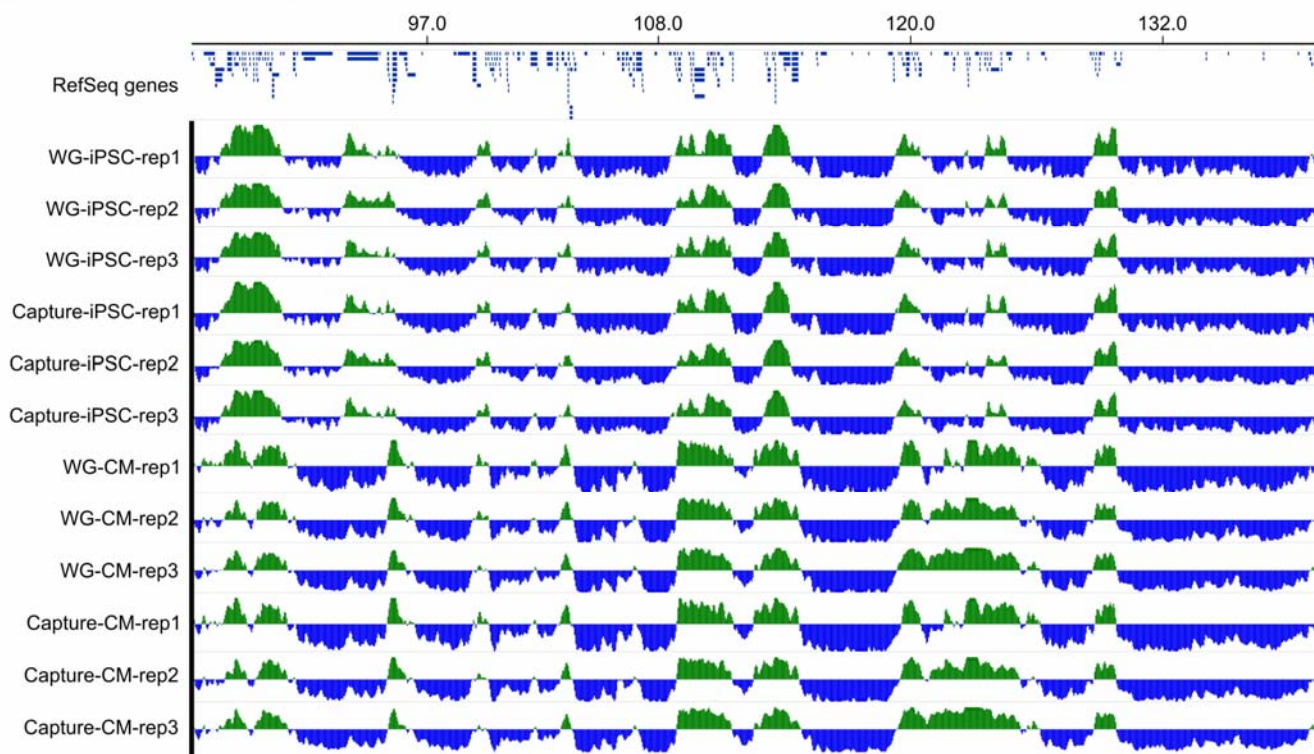

1210

1211 **Figure 4—figure supplement 2.** Genome browser snapshot of a ~53 Mb region on chromosome 4  
1212 showing A/B compartments in all three replicates of iPSCs and CMs using both whole-genome (WG)  
1213 and promoter capture Hi-C data.



## Figure 4 - Figure Supplement 3

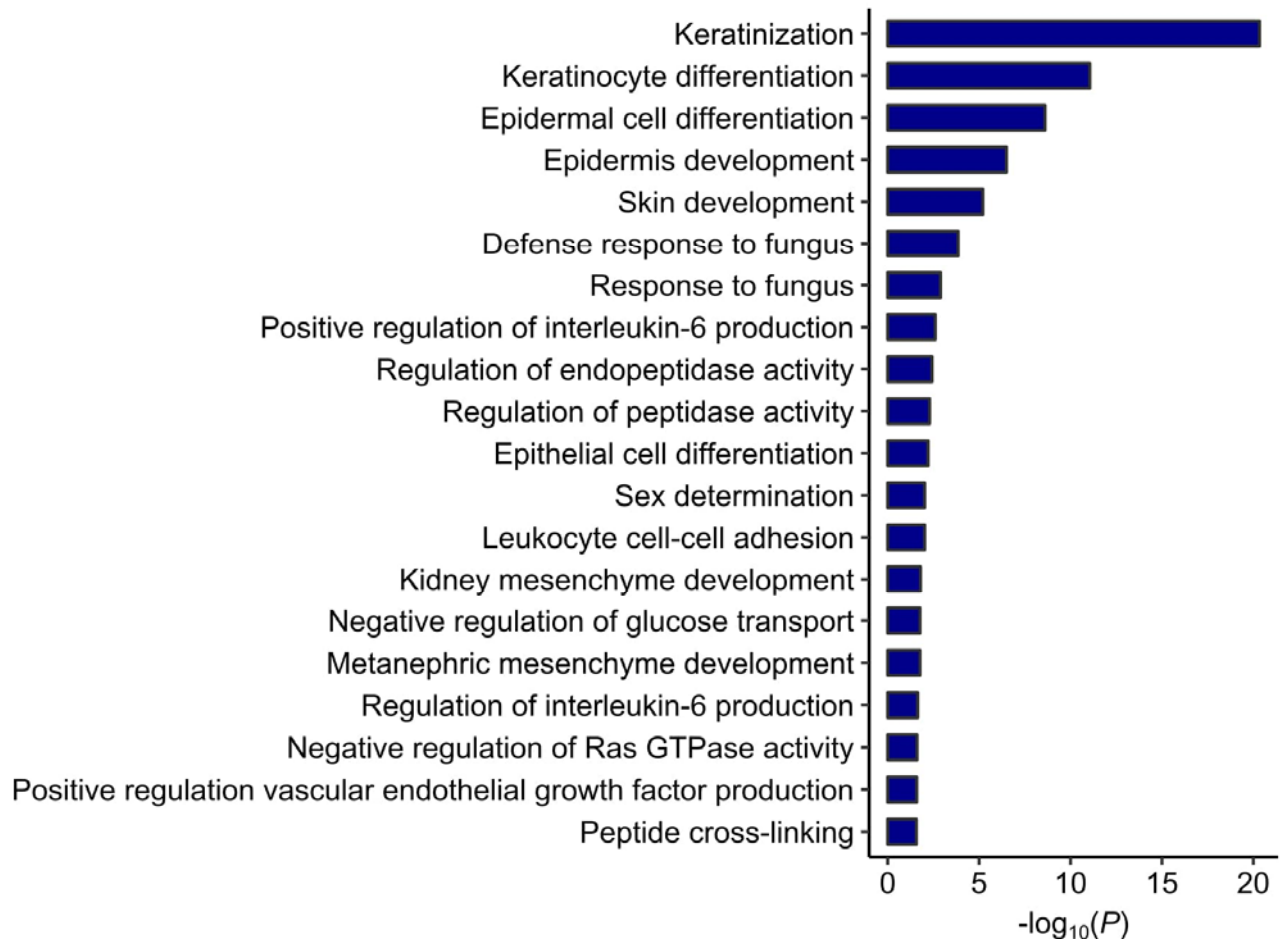

1214

1215 **Figure 4—figure supplement 3.** GO analysis on the genes switching from active A compartments in  
1216 iPSCs to inactive B compartments in CMs.

1217

1218 **Supplementary Movie 1** – Video of iPSC-derived cardiomyocytes exhibiting spontaneous beating at  
1219 day 20 of the differentiation (day of cell harvesting).

1220

1221 **Supplementary File Legends**

1222 **Supplementary File 1 – PChi-C interactions for iPSC.** Significant interactions in iPSC (identified in at  
1223 least two out of three replicates) are presented in paired bed format. Column 7 is the CHiCAGO score;  
1224 Column 8 contains the gene information (gene name, identifier, strand, TSS position). If the interaction  
1225 involves another promoter, the second gene name information is provided after the “|” symbol.

1226 **Supplementary File 2 – PChi-C interactions for CM.** Significant interactions in CM (identified in at  
1227 least two out of three replicates) are presented in paired bed format. Column 7 is the CHiCAGO score;  
1228 Column 8 contains the gene information (gene name, identifier, strand, TSS position). If the interaction  
1229 involves another promoter, the second gene name information is provided after the “|” symbol.

1230 **Supplementary File 3 – CVD SNPs.** All SNPs in high LD ( $r^2 > 0.9$ ) with CVD tag SNPs are provided.  
1231 The first 4 columns indicate the tag SNP position; columns 5-8 indicate the SNPs in LD with the tag  
1232 SNP; column 9 is the degree of LD ( $r^2$  value).

1233 **Supplementary File 4 – HOMER motif analysis for the distal interacting regions of promoter  
1234 interactions.** For each analysis presented in Figure 2, the full output of motifs identified in interacting  
1235 fragments are listed.

1236 **Supplementary File 5 – Gene Ontology enrichment output.** The full output of the GO enrichment  
1237 analysis is provided.

1238 **Supplementary File 6 – Gene Ontology input gene lists.** The list of genes used as input for GO  
1239 analysis is provided.

1240 **Supplementary File 7 – GWAS terms used to compile studies.** The list of trait terms used to filter  
1241 GWAS studies is provided.

1242 **Supplementary File 8 – GWAS summary table.** Table 8.1 contains information related to the CVD  
1243 GWAS used in this paper, including PubMed ID, first author, date of publication, journal, study title, tag  
1244 SNP chromosome position, rsID, trait. Table 8.2 contains information on each LD SNP-target gene  
1245 interaction (tag SNP and corresponding LD SNP, target gene, interaction coordinates, target gene  
1246 expression in iPSC and CM, MGI cardiovascular phenotype information).

1247 **Supplementary File 9 – Hi-C read information.** Table 9.1 contains the probe sequences used for  
1248 promoter capture, along with the corresponding gene name. Table 9.2 contains the total number of  
1249 sequenced and processed/filtered reads for each Hi-C experiment. Table 9.3 contains the number of  
1250 reads mapping to each promoter and the corresponding number of significant (present in at least two  
1251 replicates) interactions called.

1252 **Supplementary File 10 – Public datasets used.** ChIP-seq and RNA-seq datasets used in our  
1253 analyses are listed.

1254
